# Coupling between slow-waves and sharp-wave ripples organizes distributed neural activity during sleep in humans

Ivan Skelin<sup>1,2,\*</sup>, Haoxin Zhang<sup>1,3</sup>, Jie Zheng<sup>3</sup>, Shiting Ma<sup>1</sup>, Bryce A. Mander<sup>4</sup>, Olivia Kim Mcmanus<sup>5,6</sup>, Sumeet Vadera<sup>7</sup>, Robert T. Knight<sup>8,9</sup>, Bruce L. McNaughton<sup>2,10</sup>, Jack J. Lin<sup>1,3</sup>

## Affiliations

<sup>1</sup>Department of Neurology, University of California Irvine, Irvine, CA 92603, USA

<sup>2</sup>Department of Neuroscience, University of Lethbridge, Lethbridge, AB T1K 3M4, Canada

<sup>3</sup>Department of Biomedical Engineering, University of California Irvine, Irvine, CA 92603, USA

<sup>4</sup>Department of Psychiatry and Human Behavior, University of California Irvine, Irvine, CA 92603, USA

<sup>5</sup>Department of Neurosciences, University of California San Diego, San Diego, CA 92093, USA

<sup>6</sup>Division of Neurology, Rady Children's Hospital, San Diego, CA 92123, USA

<sup>7</sup>Department of Neurological Surgery, University of California Irvine, Irvine, CA 92603, USA

<sup>8</sup>Department of Psychology, University of California Berkeley, 130 Barker Hall, Berkeley, CA 94720, USA

<sup>9</sup>Helen Wills Neuroscience Institute, University of California Berkeley, 130 Barker Hall, Berkeley, CA 94720, USA

<sup>10</sup>Department of Neurobiology and Behavior, University of California Irvine, Irvine, CA 92603, USA

## Abstract

Hippocampal-dependent memory consolidation during sleep is hypothesized to depend on the synchronization of distributed neuronal ensembles, organized by the hippocampal sharp-wave ripples (SWRs, 80-150 Hz) and subcortical/cortical slow-waves (0.5-4 Hz). However, the precise role of SWR-slow-wave interactions in synchronizing subcortical/cortical neuronal activity is unclear. Here, we leverage intracranial electrophysiological recordings from the human hippocampus, amygdala, temporal and frontal cortices, to examine activity modulation and cross-regional coordination during SWRs. Hippocampal SWRs are associated with widespread modulation of high frequency activity (HFA; 70-200 Hz) a measure of local neuronal activation. This peri-SWR HFA modulation is predicted by the coupling between hippocampal SWRs and local subcortical/cortical slow-waves. Finally, local cortical slow-wave phase offsets during SWRs predicted functional connectivity between the frontal and temporal cortex. These findings suggest a selection mechanism wherein hippocampal SWR and cortical slow-wave synchronization governs the transient engagement of distributed neuronal populations supporting hippocampal-dependent memory consolidation.

## 40 Introduction

41  
42 Memory consolidation involves the transformation of newly encoded representations into  
43 long-term memory<sup>1-3</sup>. During non-rapid eye movement (NREM) sleep, hippocampal  
44 representations of recent experiences are reactivated<sup>4, 5</sup>, along with transient synchronization of  
45 distributed subcortical and cortical neuronal populations<sup>6-8</sup>. It is hypothesized that the oscillatory  
46 synchrony facilitates connections between the neuronal ensembles, stabilizing memory  
47 representations<sup>9, 10</sup>. The selection and synchronization of distant neuronal populations that  
48 participate in hippocampal-dependent memory consolidation are proposed to depend on the  
49 interaction between hippocampal sharp-wave ripples (SWRs; 80-150 Hz) and traveling  
50 subcortical/cortical slow-waves (0.5-4 Hz), but the underlying mechanisms subserving this  
51 network engagement are unclear. Here we investigated how hippocampal SWRs and  
52 subcortical/cortical slow-waves coordinate distributed neuronal populations during memory  
53 consolidation in NREM sleep.

54 Hippocampal SWRs are transient local field potential (LFP) oscillations (20-100 msec;  
55 80-150 Hz in humans) implicated in planning, memory retrieval, and memory consolidation<sup>11</sup>.  
56 Several lines of evidence highlight the role of SWRs in sleep-dependent memory consolidation.  
57 First, memory reactivation in the hippocampus, cortical and subcortical structures peaks during  
58 SWRs<sup>4-7, 12, 13</sup>. Second, hippocampal-subcortical/cortical functional connectivity, the prerequisite  
59 for binding of anatomically distributed reactivated memory traces is enhanced around SWRs<sup>7, 14-16</sup>.  
60 Finally, SWR suppression or prolongation interferes with, while prolongation of SWR duration  
61 improves hippocampal-dependent memory consolidation<sup>17, 18</sup>.

62 While research converges on the notion that SWR output modulates neuronal activity  
63 across brain regions during NREM sleep, SWR events are temporally biased by phases of  
64 slow-wave oscillations<sup>19, 20</sup>. Slow-waves are present in cortical and subcortical structures<sup>21, 22</sup>,  
65 originate in frontal areas and traverse in an orderly succession to temporal lobes and subcortical  
66 structures, including the hippocampus and the amygdala<sup>19, 22-24</sup>. Indeed, slow-wave synchrony  
67 increases following learning<sup>25</sup>, and the reduction of slow-wave synchrony is correlated with

68 memory impairment<sup>26</sup>. Finally, although slow-waves are ubiquitous, individual slow-wave  
69 trajectories are usually limited to a subset of cortical/subcortical areas, with ~80% of these events  
70 detected in less than half of recorded locations in humans<sup>22</sup>. Therefore, each SWR-associated  
71 slow-wave event could recruit and index a unique sequence of cortical and subcortical  
72 populations.

73 In this study, we used the broadband high frequency activity (HFA, 70-200 Hz)<sup>27, 28</sup>  
74 recorded from human intracranial electrodes as a metric of subcortical/cortical activity. HFA is an  
75 indirect measure of neuronal spiking from the population surrounding the electrode contact,  
76 estimated in the range of several hundred thousand neurons<sup>29</sup>. Consistent with the hypothesized  
77 role of SWR in synchronizing distributed memory traces, we found HFA power modulation during  
78 hippocampal SWR events in ~30% of extrahippocampal recording sites. Given the critical role of  
79 slow-waves in facilitating hippocampal-dependent memory consolidation<sup>15</sup> and their confinement  
80 to local regions<sup>22</sup>, we hypothesizes that slow-waves organize hippocampal - cortical and cortical -  
81 cortical interactions during SWR events. Indeed, we found a strong association between SWR  
82 phase locking to cortical slow-waves and HFA modulation in the same recording site. These  
83 findings suggest that coupling of SWRs and slow-waves drive the selection of cortical populations  
84 to participate in hippocampal - cortical communication. Theoretical constructs of memory  
85 consolidation further predict transient synchronization of neuronal populations in distant cortical  
86 regions, temporally linking cortical - cortical functional connections. In support of the cooperative  
87 role of SWR and slow-waves in orchestrating cortical - cortical communication, we found that  
88 slow-wave phase alignments between two distant cortical sites predicted their neuronal  
89 population synchronization manifested by temporal HFA power correlations. These results imply  
90 a recruitment mechanism by which coupling of slow-waves and SWRs provide communication  
91 windows for long-range interactions between distributed neuronal populations, critical for  
92 hippocampal-dependent memory consolidation.

## 93 Results

### 94 Sleep staging and SWR detection

95 We recorded overnight sleep local field potentials (LFPs) in 12 subjects ( $573 \pm 18$  minutes,  
96 range 480-725) simultaneously from the frontal lobe (including the orbitofrontal, medial prefrontal,  
97 dorsomedial and cingulate cortices), temporal lobe (including the insula, entorhinal,  
98 parahippocampal, inferior, medial and superior temporal cortices), amygdala (including the  
99 basolateral, lateral and centromedial amygdala), and hippocampus (Figure 1A-C). The  
100 localization of the depth electrodes was determined based on co-registered pre- and  
101 post-implantation magnetic resonance imaging (MRI), as well as registration to a high-resolution  
102 atlas. A trained researcher (B.A.M.) performed sleep staging guided by standard criteria<sup>30</sup> (Figure  
103 1D) using polysomnography (PSG) data collected from surface electrodes (i.e.,  
104 electroencephalography, electrooculography, and electromyography). On average, subjects  
105 spent  $287 \pm 44$  minutes (range 115 – 405 minutes) in NREM sleep, which represented  $49.9 \pm$   
106  $4.1\%$  of overnight sleep recording durations. We used depth electrodes implanted in the  
107 hippocampus to detect SWR events (see methods, Figure S1A). Hippocampal LFPs were  
108 bandpass-filtered in the SWR frequency range (80-150 Hz), rectified, and transformed to z-scores  
109 (Figure 1E). Events that exceeded five standard deviations from the mean amplitude and were  
110 beyond a one-second window of the nearest interictal epileptic discharges (Figures S1A-B) were  
111 classified as SWRs. As shown in Figure 1E, the morphology of grand-average SWR ( $n = 12$   
112 subjects; 44965 SWRs) and the numbers of SWR events per hippocampal electrode ( $1653 \pm 274$ )  
113 were consistent across subjects and in line with previous reports from humans and non-human  
114 primates<sup>20, 31-34</sup>

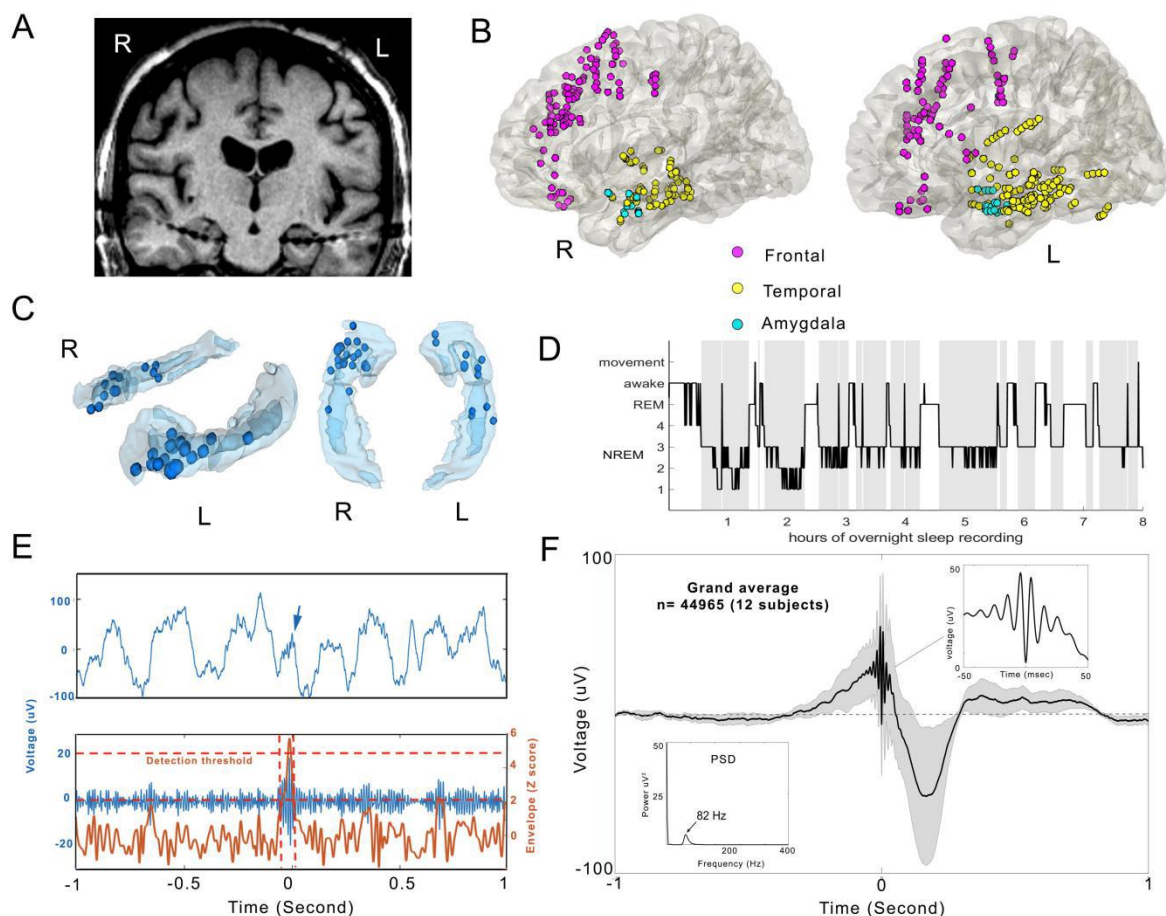

**Fig.1. Recording locations, sleep staging, and sharp-wave ripple detection.** **a**, Coronal MRI image from an example subject, showing the depth electrodes targeting the hippocampus bilaterally. Thicker areas along the electrode shafts represent the individual recording contacts. **b**, Anatomical distribution of extra-hippocampal recording locations (amygdala - cyan,  $n = 36$ ; temporal cortex - yellow,  $n = 180$ ; frontal cortex - magenta,  $n = 189$ ; medial views of the right (R) and left (L) hemispheres. Regional electrode distributions across individual subjects are shown in the Supplementary Table 1. **c**, Hippocampal electrode localizations ( $n = 33$ ) from all the subjects, shown on a 3-dimensional hippocampus model. Blue dots indicate the individual electrode locations in the left (L) or right (R) hippocampus. **d**, Overnight sleep hypnogram from an example dataset. The non-rapid eye movement (NREM) stages 2-4 were used in the analysis (grey). **e**, Example of detected sharp-wave ripple (SWR) and illustration of the detection algorithm. Top: raw LFP trace around the SWR (arrow). Bottom: blue - the LFP trace shown in the top plot, band-pass filtered in the SWR range (80-150 Hz). Orange - z-scored envelope of the filtered trace. SWR detection was based on the coincidence of two criteria: 1) SWR envelope peak crossing the mean + 5SD (upper threshold, top dashed orange line) and 2) SWR envelope around the candidate upper threshold crossing exceeding mean + 2SD for 20-100 msec (lower threshold, bottom dashed orange line). **f**, Grand-average SWR-centered raw LFP (mean  $\pm$  SEM;  $n = 12$  subjects). Time 0 corresponds to SWR peak. Top right inset: Several oscillatory cycles around the grand-average SWR peak reflect the oscillatory nature of detected SWR events, lasting several tens of msec. Bottom left inset: Power spectral density (PSD) averaged across all detected SWRs. Unimodal peak (82 Hz) suggests the lack of contamination with epileptic activity, which is typically reflected as an additional PSD peak in  $> 200$  Hz range<sup>33</sup>.

## Hippocampal sharp-wave ripples modulate subcortical and cortical high frequency activity

Functional MRI studies show a widespread peri-SWR activity modulation<sup>35</sup>, but the precise timing and anatomical distribution of the neuronal activity is unclear. Therefore, we leveraged millisecond temporal resolutions and broad anatomical coverage of intracranial

145 electrophysiological recordings to measure HFA power (a proxy of neuronal population activity)  
146 during SWR windows ( $\pm 250$  msec, relative to SWR peak). We paired each hippocampal  
147 recording site containing a minimum of 100 SWRs/overnight recording session with  
148 simultaneously recorded extra-hippocampal recording sites and operationally defined the pairs as  
149 target sites ( $n = 1308$ , 625 ipsilateral and 683 contralateral to SWR location; Figure 2A). All of  
150 the electrodes used in the analysis were localized in gray matter (see Methods). Based on the  
151 presence or absence of significant peri-SWR HFA modulation (see Methods), target sites were  
152 classified as either HFA+ or HFA-. We found significant peri-SWR HFA power modulation in  
153 28.1% (368/1308) of target sites. Linear regression analysis showed significant main effects of  
154 region ( $F(1,1304) = 219.6$ ,  $p < 10^{-10}$ ) and hemisphere ( $F(1,1304) = 133.5$ ,  $p < 10^{-10}$ ) on the  
155 percentage of target sites showing peri-SWR HFA modulation, as well as a region by hemisphere  
156 interaction ( $F(1,1304) = 109.5$ ,  $p < 10^{-10}$ ). Moreover, the percentage of peri-SWR HFA modulated  
157 subcortical/cortical target sites was significantly higher when SWRs originate from the same  
158 hemisphere (278/625, 44.5%) versus SWRs arising from the contralateral hemisphere (110/683;  
159 16.1%; Figure S2A; chi-square:  $\chi^2(1, n = 1308) = 116.2$ ,  $p < 10^{-10}$ ). The highest percentage of  
160 modulated sites were in the amygdala (88.6% ipsilateral and 30.2% contralateral to SWR),  
161 followed by the temporal (67.6% ipsilateral and 19.2% contralateral) and  
162 the frontal cortex (15.1% ipsilateral and 12.2% contralateral; Figure 2C, S2B). Detailed statistical  
163 comparisons of regional and hemispheric peri-SWR HFA modulation are shown in Supplementary  
164 Tables 2A and B. We classified peri-SWR HFA power modulations as either: 1) positive  
165 (increased HFA power); 2) negative (decreased HFA power); or 3) mixed (both periods of  
166 increased and decreased HFA power; Figure 2B). Positive modulations were the most common  
167 modulation class (266/368, 72.3% of HFA-modulated target sites), followed by mixed-modulations  
168 (74/368, 20.1%) and negative-modulations (28/368, 7.6%). Overall, these findings suggest an  
169 anatomically - specific engagement of neuronal populations during SWR windows.

170  
171  
172



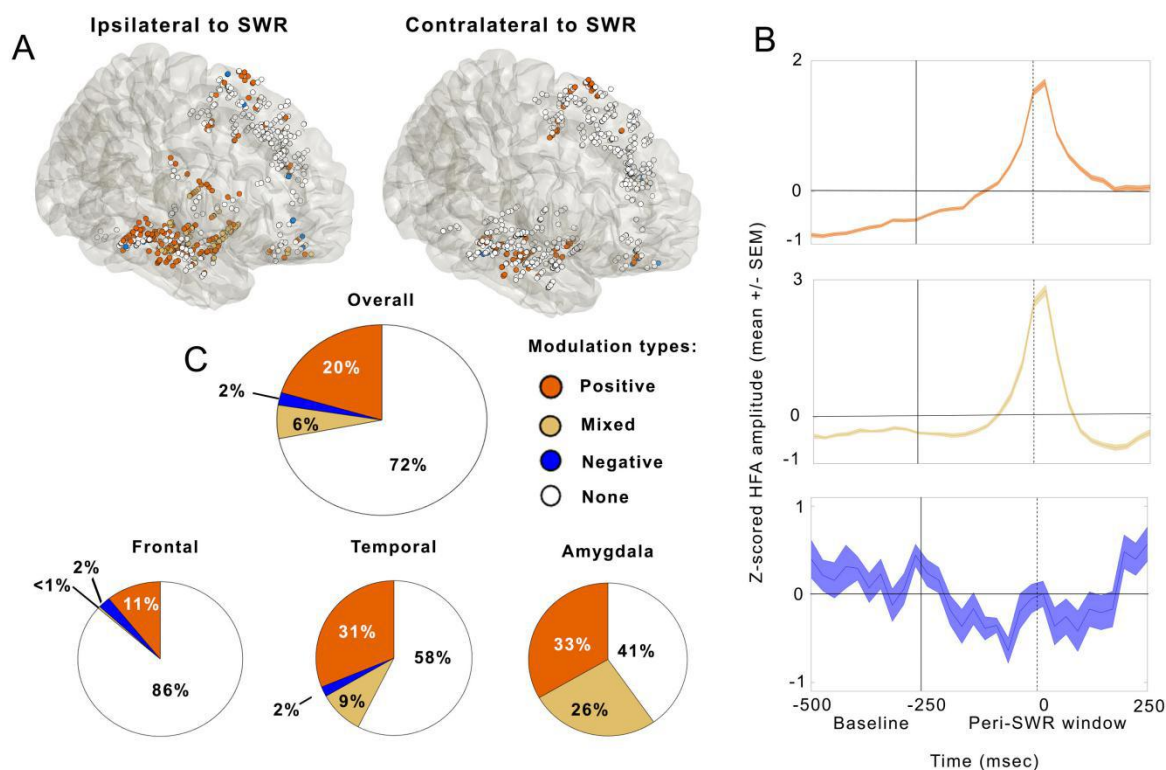

**Fig. 2. High frequency activity (HFA) modulation around sharp-wave ripples (SWRs).** **a**, Anatomical distributions of peri-SWR HFA modulation ipsilateral (left) and contralateral (right) to SWR location. Orange - positive-modulation, blue - negative-modulation, ochre - mixed modulation and white - no modulation (1308 target sites, 625 ipsilateral and 683 contralateral to SWR location). Target sites are defined as extra-hippocampal recording locations. When SWRs are recorded from multiple hippocampal channels in the same subject, locations of target sites are minimally jittered for visualization purposes. The most common significant peri-SWR HFA modulations are positive-modulations ipsilateral to SWR location in temporal and amygdala sites. See also Movie S1 for the temporal dynamics of peri-SWR HFA modulation. **b**, Average z-scored peri-SWR HFA time-courses (mean  $\pm$  SEM) from all the target sites showing a given modulation type (positive-modulation - top, mixed modulation - middle, negative-modulation - bottom). Tick vertical line denotes the boundary between baseline (-500 to -250 msec, relative to SWR peak time) and peri-SWR window ( $\pm$  250 msec around SWR peak time). SWR peak time is denoted by the vertical dashed vertical line. **c**, Percentages of significant peri-SWR HFA modulation overall (top chart) and at the regional level (bottom charts). Orange - positive modulation, blue - negative modulation, ochre mixed modulation and white - no modulation.

While the previous analysis characterizes modulation at the level of individual target sites, memory consolidation theories predict coordinated activity of distributed neuronal populations around hippocampal SWR windows. Thus, we hypothesized that these temporal profiles co-vary across target sites around the time of SWR. To examine the low dimensional representation of neural population activity, we performed a principal component analysis (PCA) on the HFA time-courses derived from a pseudo-population of HFA modulated target sites, ipsi- and contra-lateral to hippocampal SWRs ( $n = 368$ ). Consistent with the prediction of a low dimensional space of peri-SWR HFA dynamics, the first three principal components (PCs) accounted for

198 55.5%, 15.0%, and 6.2% of the explained variance (EV), respectively (cumulative EV = 76.7%;  
199 Figure 3A). Reconstructed activity time-courses of these three PCs revealed distinct dynamics,  
200 with PC1 activity showing a symmetric increase around the hippocampal SWR, while PC2  
201 time-course showing a persistent activity increase following the SWR (Figure 3B). The PC3  
202 time-course is bimodal, characterized by activity peaks both before and after the SWR peak  
203 (Figure 3B). For each of the first three PC scores, a two-way ANOVA (with region and hemisphere  
204 relative to SWR location as main factors) showed significant main effects of region ( $F(2,367) > 7$ ,  
205  $p$ 's  $< 10^{-3}$ ) and hemisphere ( $F(1,367) < 8$ ,  $p$ 's  $< 10^{-5}$ ), as well as region by hemisphere  
206 interactions ( $F$ 's(1,2)  $> 11$ ,  $p$ 's  $< 10^{-4}$ ), except for PC3 ( $F(2,367) = 2.37$ ,  $p = 0.1$ ). Remarkably, PC  
207 distributions showed regional specificity, with PC1 dynamics represented in the amygdala and the  
208 temporal cortex, while PC2 dynamics characterized the peri-SWR HFA in the frontal cortex  
209 (Figures 3C). Detailed statistical comparisons of regional PC weights are shown in  
210 Supplementary Table 3. Further, for different brain regions, the state-space trajectories around  
211 the time of the SWR show distinct dynamics (Figure 3D). The trajectories derived from the  
212 amygdala and the temporal cortex peri-SWR HFA are characterized by increased velocity around  
213 the SWR peak and returning thereafter to the baseline (Figure 3D). In contrast, the state space  
214 trajectory derived from the frontal cortex peri-SWR HFA is characterized by a slower velocity  
215 along the PC2 axis, without returning to the baseline within the 250 msec after the SWR peak.  
216 This analysis reveals low-dimensional peri-SWR HFA dynamics, which could be organized by  
217 oscillatory synchrony. Based on the role of slow-waves in long-range synchronization supporting  
218 the hippocampal-dependent memory consolidation<sup>15, 20, 25, 36</sup>, we next sought to discern the  
219 potential role of SWR and slow-wave interactions in facilitating cortical - cortical communication.



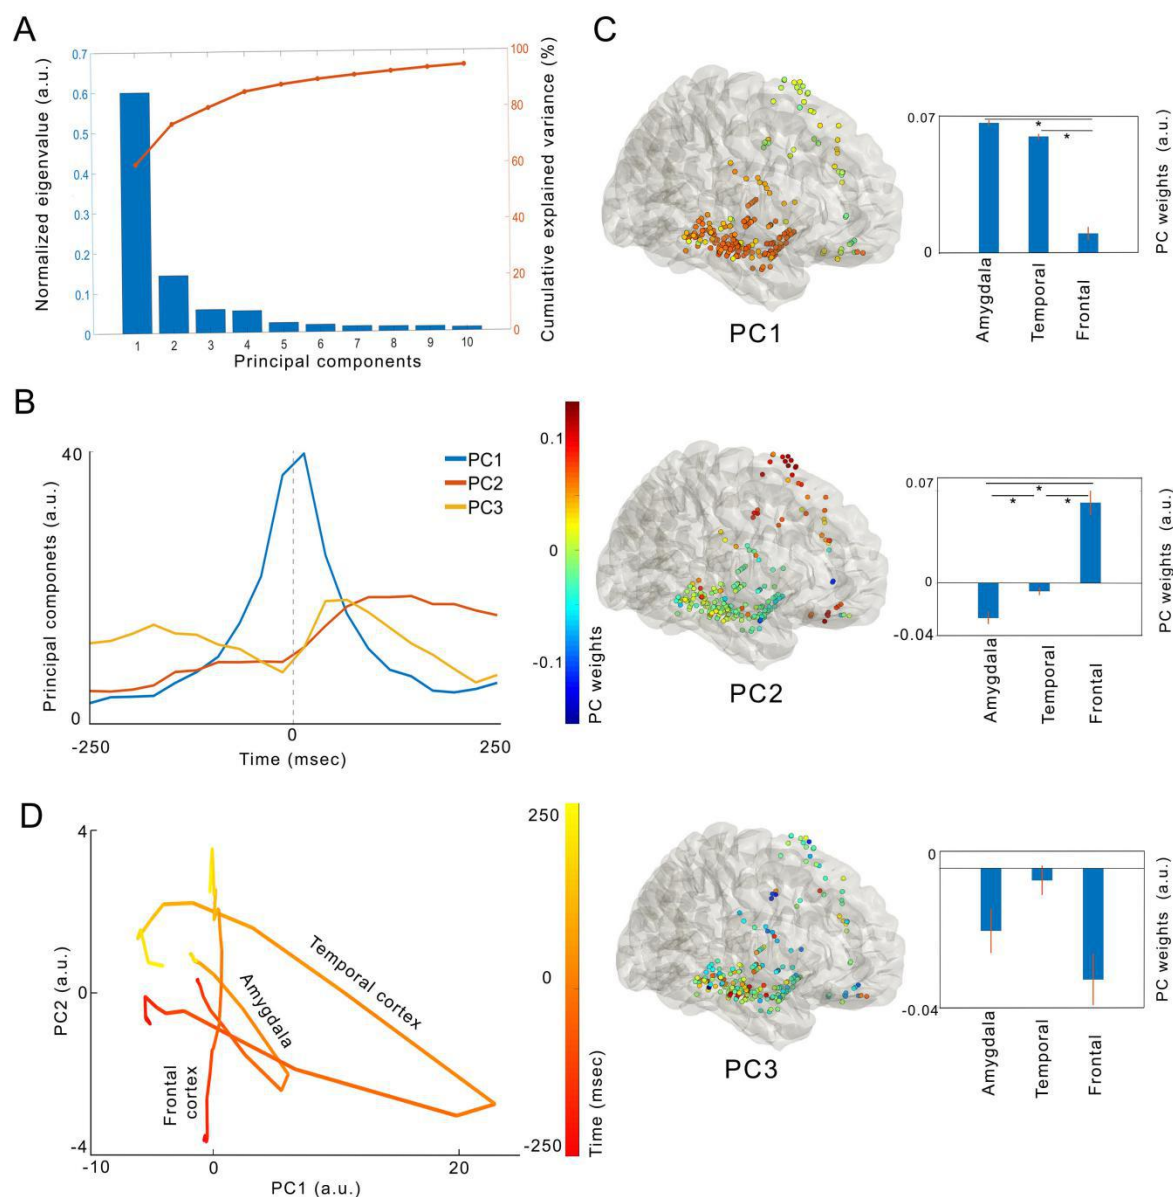

226

227 **Fig. 3. Principal component analysis shows low-dimensional and regionally-specific peri-SWR HFA**  
 228 **dynamics patterns.** **a**, Blue bars - normalized eigenvalues and orange line - cumulative explained variance (EV) for  
 229 the first ten principal components. The first three principal components show significance (see Methods), with  
 230 cumulative EV ~80%. **b**, Reconstructed peri-SWR HFA time-courses ( $\pm 250$  ms) of the first three principal components,  
 231 centered on the SWR peak (dashed gray vertical line). PC1 activity is characterized by a symmetric peak around SWR,  
 232 while the PC2 activity shows a protracted increase following SWR. PC3 activity time-course is bimodal, with distinct  
 233 peaks both before and after the SWR peak. **c**, Left column: Glass brain maps of different PC weights in the hemisphere  
 234 ipsilateral to SWR peak, denoted by color. Right column: the first three PC weights. Right column: Pseudo-population  
 235 regional means of the PC weights for the corresponding PCs from the left column. PC1 weights in amygdala and  
 236 temporal cortex are higher, relative to frontal cortex, while the anatomical distribution of PC2 weights shows the  
 237 opposite pattern (two-tailed t-test,  $p < 0.05$ , statistical details in Supplementary Table 3). Data is shown as mean  $\pm$  SEM.  
 238 **d**, Projections in state space of the ipsilateral regional average trajectories for the first two PCs, which were showing  
 239 regional weight differences. Line color gradient denotes the time domain, ranging from -250 msec to 250 msec, relative  
 240 to the SWR peak. Note the increased state-space distances between adjacent time-points closer to SWR peak time,  
 241 reflecting the higher velocity in state space. Amygdala and temporal cortex trajectories tend to move along both PC1  
 242 and PC2 axes, while the frontal cortex trajectory moves mostly along the PC2 axis. In addition, the amygdala and  
 243 temporal cortex trajectories return close to origin by the end of the peri-SWR period. In contrast, the frontal cortex  
 244 trajectory remains in a different part of state space, suggesting prolonged activity in frontal populations modulated  
 245 around SWR.

## 246 **SWR synchrony with subcortical/cortical slow-waves predicts local activity**

### 247 **modulation**

248 If slow-waves rhythmically modulate neuronal excitability<sup>21, 22</sup>, we hypothesized that the  
249 synchrony between hippocampal SWRs and slow-waves at individual subcortical/cortical target  
250 sites would predict local HFA modulation. For each target site, we define SWR-slow-wave  
251 synchrony as significant phase-locking between hippocampal SWRs and local slow-waves  
252 (Rayleigh test,  $p < 0.05$ , with Benjamini-Hochberg correction for multiple comparisons; Figure 4A  
253 and Methods). First, we found a higher percentage of target sites with SWR-slow-wave synchrony  
254 in the ipsilateral, compared to contralateral hemisphere, relative to the SWR location (39.4%  
255 (246/625) vs. 13.8% (94/683);  $\chi^2(1, n = 1308 \text{ target sites}) = 131.3, p < 10^{-10}$ ; Figure 4B and S4A).  
256 Second, the percentage of SWR-slow-wave synchrony was significantly higher for HFA+, relative  
257 to HFA- sites (ipsilateral HFA+ = 71.7% (185/258), HFA- = 16.6% (61/367),  $\chi^2(1, n = 625 \text{ target}$   
258  $\text{sites}) = 182.5, p < 10^{-10}$ ; contralateral HFA+ = 37.3% (41/110), HFA- = 9.3% (53/573),  $\chi^2(1, n =$   
259  $683 \text{ target sites}) = 53.4, p < 10^{-10}$ ), Figure S4B). Further, a higher percentage of SWR-slow-wave  
260 synchrony in HFA+ relative to HFA- target sites was present in all recorded brain regions except  
261 in the ipsilateral amygdala (89.8% HFA+ (35/39) or 60% (3/5) HFA- sites ( $\chi^2(1, n = 44 \text{ recorded}$   
262  $\text{sites}) = 3.33, p = 0.07$ ; Figure S4C). In all other recorded brain regions, including the contralateral  
263 amygdala, the percentage of SWR-slow-wave synchrony was 2-4 times higher in HFA+, relative  
264 to HFA- target sites (Figure S4C; Supplementary Table 4, all  $p$ 's  $< 10^{-3}$ ).

265 After establishing association between the presence of SWR-slow-wave synchrony and  
266 local HFA modulation, we tested the relation between the SWR-slow-wave synchrony magnitude  
267 and the strength of local peri-SWR HFA modulation. We define the synchrony magnitude as the  
268 length of mean vector  $r$  (Rayleigh test) and peri-SWR HFA modulation strength as the sum of  
269 HFA power (baseline-corrected and z-scored). SWR-slow-wave synchrony was positively  
270 correlated with HFA modulation strength around the SWR peak (Figure 4C), reaching the  
271 maximum correlation at 25 msec (Spearman  $r = 0.26, p < 10^{-10}$ ;  $n = 1308 \text{ target sites}$ ).

272 The anatomical selectivity of SWR-slow-wave synchrony is not attributable to slow-wave  
273 power, as this parameter is not different between target sites with and without significant

274 SWR-slow-wave synchrony (Figure S4D; independent samples two-tailed t-test,  $t(1306) = 0.19$ ,  $p$   
 275  $= 0.85$ ;  $n = 1308$ ). In summary, these findings indicate that the synchrony between hippocampal  
 276 SWRs and target site slow-waves is a potential mechanism for selecting neuronal populations to  
 277 participate in widespread synchronous activity during SWRs.

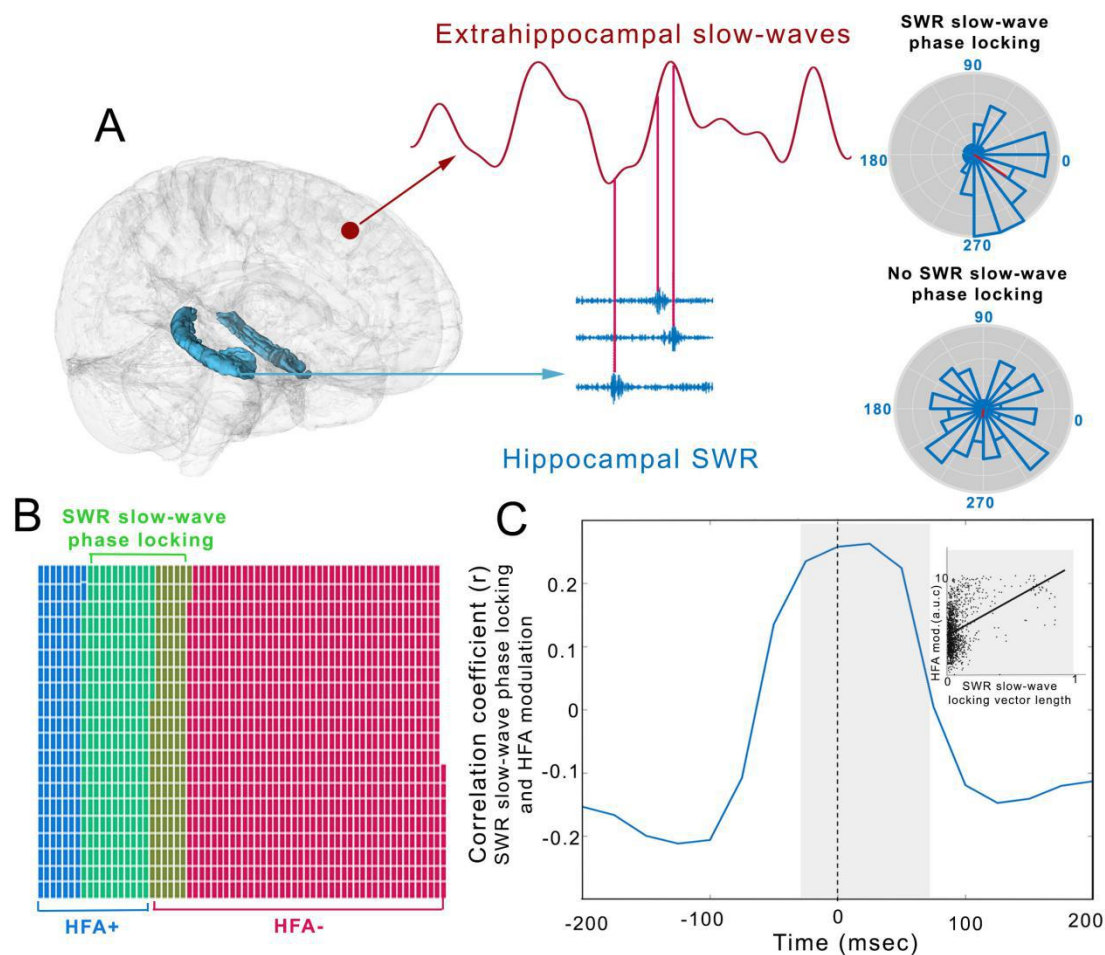

278

279 **Fig.4. SWR synchrony with subcortical/cortical slow-waves predicts local peri-SWR HFA modulation. a,**  
 280 Illustration of the SWR-slow-wave phase locking. Local slow-wave phases from an example extra-hippocampal target  
 281 site (maroon) corresponding to SWR peak times on simultaneously recorded hippocampal channel (blue) are used to  
 282 construct the target site-specific circular distribution of slow-wave phases coinciding with hippocampal SWR peaks. The  
 283 distribution uniformity is tested with the Rayleigh test ( $p < 0.05$ , Benjamini-Hochberg correction for multiple  
 284 comparisons). Based on the presence of significant non-uniformity, the target sites are classified as showing  
 285 SWR-slow-wave synchrony (SWR-slow-wave+) or no synchrony (SWR-slow wave-). Right column: Polar plots showing  
 286 the distribution of slow-wave phases at SWR peak times for the SWR-slow wave+ (top) and SWR-slow-wave- (bottom)  
 287 example target sites. **b**, Venn diagram showing the larger overlap between the target sites showing SWR-slow wave  
 288 synchrony (green) and HFA+ (blue), relative to HFA- (red) target sites ( $\chi^2(1, n = 1308) = 333.9$ ,  $p < 10^{-10}$ ). Individual  
 289 target site are represented as squares. **c**, Correlation between the HFA modulation strength and extent of SWR-slow  
 290 wave phase locking (as denoted by the length of  $r$  vector), calculated for 100 msec sliding windows (25 msec step size).  
 291 The peak correlation is shown for the window ranging from -25 to 75 msec around the SWR peak (Spearman  $r = 0.26$ ,  $p$   
 292  $< 10^{-10}$ ). Inset: scatter plot illustrating the positive correlation between vector length and HFA modulation strength in the  
 293 highlighted window. For both plots,  $n = 1308$  target sites.

294

295

## 296 **Slow-wave phase difference during sharp-wave ripples predicts cortico-cortical**

### 297 **coupling**

298 As demonstrated by simultaneous recordings from multiple locations in the monkey visual  
299 cortex, neuronal population locking to specific phases of local gamma oscillations determines  
300 their functional coupling<sup>37</sup>. Similarly, we hypothesized that the HFA locking to slow-wave phases  
301 during SWR windows determines the strength of pairwise coupling between populations across  
302 the subcortical/cortical regions, organizing functionally connected transient modules<sup>36</sup>. HFA  
303 coupling is defined as the temporal correlation between the HFA analytic amplitude time-courses  
304 at different target sites. To test this hypothesis, we first quantified the target site pairwise HFA  
305 coupling during SWR windows, using a generalized linear model<sup>38</sup>. This method allows pairwise  
306 coupling estimation while factoring out the contribution of common coupling to global neuronal  
307 activity. For a given target site pair (A and B), peri-SWR HFA time-course on target site A (HFA-A)  
308 was modeled based on two regressors, peri-SWR time-course on target site B (HFA-B) and  
309 average population peri-SWR HFA time-course (HFA-pop). We define the population activity as  
310 HFA from all the simultaneously recorded target sites, except A and B. This method produced a  
311 pair-specific coupling coefficient ( $\beta_0$ ), with amplitude reflecting the coupling strength and sign  
312 reflecting positive or negative coupling. We repeated this analysis on the same target site pair, but  
313 with HFA-A and HFA-pop used as regressors for modeling HFA-B. Next, we tested the  
314 association between the pairwise HFA coupling and local slow-wave phases at the time of SWR.  
315 The analysis focused on a subset of target site pairs meeting both of the following criteria: 1) HFA  
316 modulation (HFA+; Figure 2) during the SWR window and 2) SWR synchrony with local  
317 slow-waves (Figure 4). For each target site pair, we correlated the coupling coefficient  $\beta_0$  and the  
318 slow-wave phase difference ( $\phi_{diff}$ ) between two target sites at the SWR occurrence time (Figure  
319 5A-C). When analyzing target site pairs from all the regions in both hemispheres together,  $\beta_0$ - $\phi_{diff}$   
320 correlation was not significant after correcting for multiple comparisons using the Benjamini and  
321 Hochberg method (Spearman correlation,  $n = 1716$  pairs,  $r = -0.04$ ;  $p = 0.045$ ). These findings  
322 suggest that slow-wave phase differences did not predict HFA coupling at the global level. We  
323 next computed the  $\beta_0$ - $\phi_{diff}$  correlation for within-region (e.g., amygdala - amygdala pairs) and



324 cross-region sets (e.g., frontal - temporal cortex pairs) with at least 20 simultaneously recorded  
 325 target site pairs (Figure 5A). The frontal-temporal target site pairs ipsilateral to the side of  
 326 hippocampal SWR showed significantly negative  $\beta_0$ - $\phi_{diff}$  correlation (Figure 5D; Spearman  
 327 correlation,  $n = 166$  pairs;  $r = -0.26$ ,  $p < 0.001$ ). Negative  $\beta_0$ - $\phi_{diff}$  correlation reflects the positive  
 328 functional coupling with small slow-wave phase offsets at the time of SWR and negative coupling  
 329 with larger phase offsets. These results show that the local slow-wave phase difference at the  
 330 time of SWR occurrence determines the HFA coupling between the frontal and temporal target  
 331 sites. This coordination mechanism appears specific for frontal-temporal interactions as there was  
 332 no significant  $\beta_0$ - $\phi_{diff}$  correlation within or across any other regions (see Supplementary Table 5 for  
 333 statistics).

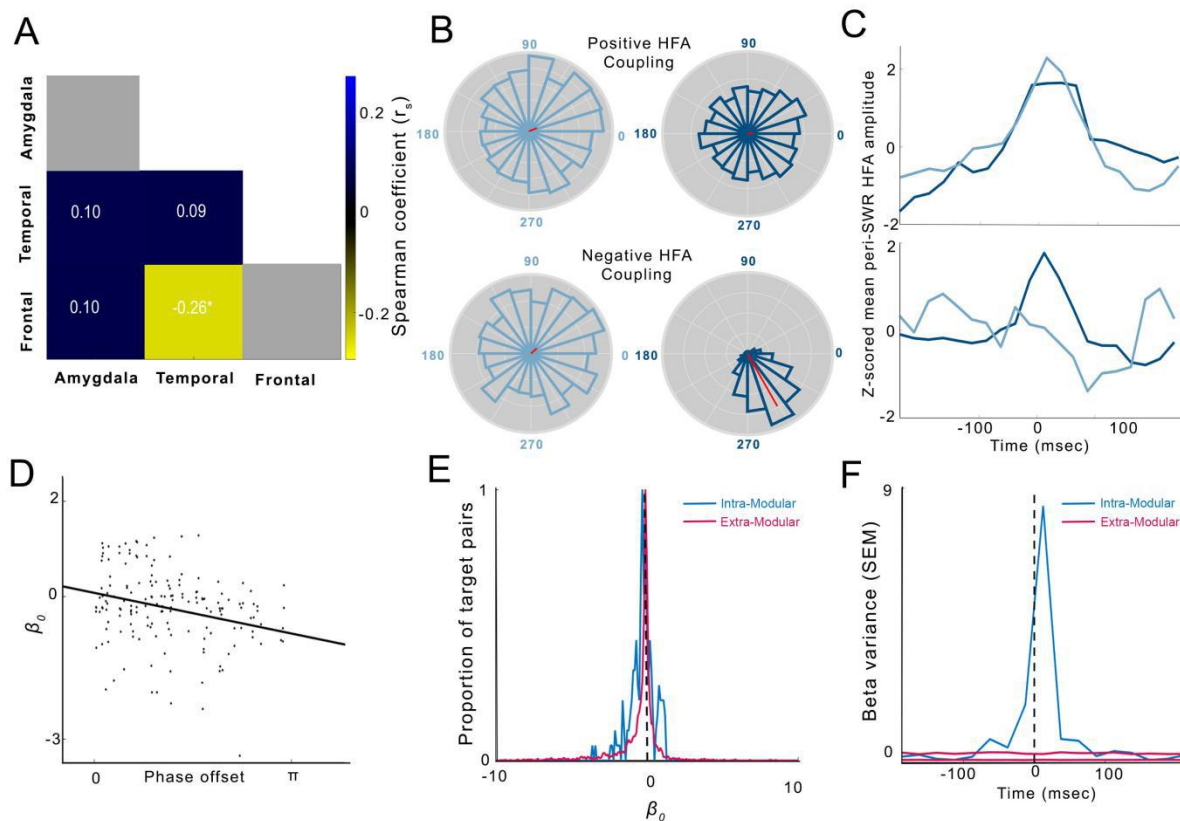

334

335 **Fig. 5. Correlations between the pairwise SWR-slow-wave phase difference ( $\phi_{diff}$ ) and HFA coupling ( $\beta_0$ ).** **a**,  
 336 Correlation matrix for ipsilateral within- and cross-structure SWR-slow wave phase-locking difference  $\phi_{diff}$  and HFA  $\beta_0$ .  
 337 Color denotes the Spearman  $r$  value for a given region pair. White color denotes the region pairs with  $< 20$   
 338 simultaneously recorded target site pairs, which were excluded from the analysis. **b**, Examples of SWR-slow wave  
 339 phase distributions for the target site pairs showing highly positive (top row) or negative (bottom row) HFA coupling ( $\beta_0$ ).  
 340 **c**, Peri-SWR HFA time courses from the target site pairs in **b**. Positive or negative HFA coupling is associated with  
 341 small or large  $\phi_{diff}$ , respectively. **d**, Scatter plot showing the negative correlation between the  $\phi_{diff}$  and HFA  $\beta_0$  for the  
 342 frontal-temporal target sites from the hemisphere ipsilateral to SWR location (Spearman correlation ( $r = -0.26$ ,  $p <$   
 343  $0.001$ ;  $n = 166$  pairs). Negative correlation denotes the functional coupling between the pair of frontal-temporal sites  
 344 becoming positive with decreased local slow-wave phase differences at the time of SWR. **e**, Histogram of pairwise HFA  
 345  $\beta_0$  coefficients for the intra-modular (blue) and extra-modular (maroon) frontal-temporal target site pairs. Distribution of

346 intra-modular  $\beta_0$  is significantly wider dispersed around zero, denoting the higher proportion of strongly positively or  
347 negatively coupled intra-modular pairs, relative to both extra-modular and combined target pairs (Ansari-Bradley  
348 dispersion test,  $p < 0.002$ ). f, Variance of pairwise frontal-temporal intra-modular (blue) and extra-modular (maroon)  $\beta_0$   
349 coefficients during the window around SWR. Extra-modular variance is shown as 1<sup>th</sup> and 99<sup>th</sup> percentile of 100 random  
350 samples for each sliding window. SWR peak time is shown as dashed line.  
351

352 If slow-waves organize transient functional modules around the time of SWRs<sup>36, 39</sup>, then the  
353 HFA+ target sites organized by slow-waves (intra-modular) would show stronger mutual coupling,  
354 relative to coupling with other target sites (extra-modular). Also, the strong intra-modular coupling  
355 should appear transiently, locked to SWR events. We define coupling strength as the dispersion  
356 width of HFA pairwise coupling coefficients ( $\beta_0$ ). We observed that the intra-modular  
357 frontal-temporal coupling strength was significantly stronger, relative to extra-modular  
358 (Ansari-Bradley test,  $n = 166$  intra-modular and 3026 extra-modular target site pairs,  $p < 0.002$ ;  
359 Figure 5E). These findings are conceptually similar to the wider dispersion of spike train coupling  
360 coefficients between the intra-modular, relative to extra-modular grid cell pairs, which indicated  
361 the modular organization in the entorhinal cortex<sup>38</sup>.

362 Finally, to test if the higher frontal-temporal intra-modular coupling strength is transient and  
363 locked to hippocampal SWRs, we compared the variance (expressed as the standard error of  
364 mean, SEM) of intra- and extra-modular coupling strengths using a sliding window (100 msec  
365 width, 25 msec step size), centered between -200 and 200 msec around SWR peak. To avoid the  
366 effect of unequal sample size on variance, for each time window, we randomly sampled 100 sets  
367 of extra-modular target site pairs, equal in size to the intra-modular set ( $n = 166$ ). Indeed,  
368 intra-modular connectivity variance was significantly higher compared to extra-modular  
369 connectivity within  $\pm 100$  msec window of hippocampal SWR (Figure 5F; >99th percentile of the  
370 extra-modular set;  $p < 0.01$ ). In summary, these results confirm the presence of modular  
371 organization of distributed neural activity during SWR windows, which could support the functional  
372 segregation of populations participating in global peri-SWR activation preventing interference  
373 from random background activity<sup>10</sup>. Furthermore, the transient nature of modular activity locked to  
374 SWRs suggests that HFA coupling does not reflect the stable connectivity patterns during NREM  
375 sleep, but emerges from SWR-slow-wave coordination.  
376



## Discussion

377  
378  
379 These findings reveal widespread modulation of brain activity during hippocampal SWRs  
380 during time windows of memory reactivation in the hippocampus and associated  
381 subcortical/cortical structures<sup>8, 11, 40</sup>. In addition, there is a strong correlation between peri-SWR  
382 activity modulation in a given location and synchrony between hippocampal SWRs and local  
383 subcortical/cortical slow-waves. Thus, SWR-slow-wave synchrony may act as a mechanism for  
384 selecting distributed populations recruited simultaneously with hippocampal memory traces  
385 reactivated during SWRs. Finally, functional coupling between the pairs of sites in frontotemporal  
386 network during SWR windows is correlates with phase offsets between the local slow-waves. This  
387 could underlie the formation of temporary neuronal coalitions around the SWRs, as predicted by  
388 memory consolidation theories<sup>3, 36, 41</sup>.

### Peri-SWR HFA modulation

389  
390 Most of the peri-SWR HFA modulations were positive, in line with the observations of  
391 widespread increase in cortical blood oxygen level-dependent (BOLD) signal and the higher  
392 probability of cortical gamma bursts during peri-SWR windows<sup>32, 35</sup>. Mixed peri-SWR HFA  
393 modulations, were mostly present in temporal lobe ipsilateral to SWR location, manifested as HFA  
394 increase around the SWR peak, followed by decrease 100-200 msec later (Figure 2B,  
395 Supplementary Movie 1). Peri-SWR HFA negative-modulations were of lower amplitude and most  
396 common in the frontal cortex (~15% of modulations in that region; Figure 2C). The presence of  
397 both positively and negatively modulated peri-SWR HFA in frontal areas could reflect consistent  
398 co-occurrence of local up-to-down or down-to-up state transitions with SWRs. However, the low  
399 SWR density during cortical down-states<sup>7, 22, 42</sup> and the wider spatial synchronization of  
400 down-states<sup>22</sup>, would likely result in more widespread peri-SWR HFA negative modulation than  
401 observed in the present data. Another possible interpretation of frontal peri-SWR HFA negative  
402 modulations could be the recruitment of local inhibitory networks, similar to increased firing of  
403 inhibitory interneurons in deep layers of rodent prefrontal cortex during SWRs<sup>43</sup>.

404 Peri-SWR HFA modulation is region- and hemisphere-dependent, with higher  
405 percentages ipsilateral to SWR location (Figures 2C, D and S2A, Supplementary Movie 1), as

406 well as in the temporal lobe structures (amygdala and temporal cortex), where it reached  
407 >70-80% of target sites in the ipsilateral and 20-30% in the contralateral hemisphere. Interestingly,  
408 hemispheric differences were not present in the frontal cortex, where 15-20% of sites were  
409 modulated irrespective of the SWR origin laterality (Figures 2C, E, S2B, and C). In addition to  
410 classifying the peri-SWR HFA modulation based on direction of change, we applied PCA to  
411 assess the dimensionality of peri-SWR HFA time-course. PCA revealed the low dimensionality of  
412 peri-SWR HFA time-courses, with ~80% of variance explained by the first three principal  
413 components (Figure 3A). This low dimensionality shows a robust regional mapping, with the sites  
414 carrying high PC1 weights, characterized by symmetric peri-SWR activity increase located  
415 predominantly in the amygdala and temporal cortex. On the other hand, the sites carrying high  
416 PC2 weights, characterized by persistent delayed increase following SWR - located mostly in the  
417 frontal cortex (Figure 3B). Widespread and low-dimensional peri-SWR HFA modulation suggests  
418 the synchronized activation of distributed neuronal ensembles during SWR windows, a necessary  
419 prerequisite for binding of distributed memory traces underlying hippocampal-dependent memory  
420 consolidation<sup>10</sup>. Higher presence of HFA modulation in temporal cortex and amygdala could  
421 reflect enhanced connectivity between the hippocampus and temporal lobe structures, relative to  
422 hippocampal-frontal connectivity, although the frontal cortex is one of the principal hippocampal  
423 target areas outside the temporal lobe<sup>44</sup>.

### 424 **SWR-slow-wave synchrony predicts local HFA modulation**

425 We demonstrate that the consistent relation between the hippocampal SWR timing and  
426 subcortical/cortical slow-wave phases (SWR-slow-wave synchrony) strongly predicts a subset of  
427 local populations participating in global peri-SWR activation<sup>35</sup>, proposed to be involved in memory  
428 consolidation<sup>36, 40</sup>. The sites with significant peri-SWR modulation or no modulation co-exist in the  
429 same brain structures (Figure 2A). Such a selective pattern of peri-SWR HFA modulation  
430 suggests that besides the necessary anatomical connectivity, the local subcortical/cortical  
431 slow-waves could provide a gating mechanism that enables the peri-SWR HFA modulation. The  
432 traveling slow-waves tend to emerge from frontal lobe and spread in the anterior-posterior  
433 direction<sup>23</sup>, but the site of origin, traveling directions and velocities across individual waves are

434 highly variable<sup>22, 23</sup>. Moreover, ~85% of slow-waves in the human brain show relatively limited  
435 extent, invading less than half of recorded locations<sup>22</sup>. Although the slow-wave trajectories are  
436 constrained by anatomical connections<sup>45</sup>, slow-waves are theoretically capable of sampling from  
437 a large combinatorial space of subcortical/cortical populations, enabling their synchronous activity  
438 during individual peri-SWR windows. Slow-waves are regulated by local learning history and  
439 appear with higher amplitude and more often in the regions involved in recent learning<sup>46, 47</sup>. This  
440 could be due to locally-regulated mechanisms, such as learning-dependent changes in  
441 excitatory-inhibitory balance<sup>48</sup>, that creates the path of least resistance for the traveling  
442 slow-waves, biasing their trajectories towards populations modified by recent learning. Hence, the  
443 slow-wave trajectory could be biased towards visiting the areas involved in recent learning,  
444 thereby representing the dynamic selection mechanism for synchronized reactivation of  
445 distributed memory traces around the SWRs, facilitating hippocampal-dependent memory  
446 consolidation<sup>15</sup>.

#### 447 **Slow-wave phase during SWRs determines cortico-cortical functional coupling**

448 Slow-waves synchronization in anatomically distributed neuronal populations during  
449 peri-SWR periods could facilitate formation of transient neuronal coalitions providing a  
450 mechanism for binding of distributed memory traces<sup>36</sup>. We demonstrate that the strength and sign  
451 of long-distance interactions in the fronto-temporal network during SWR windows are dependent  
452 on the phase differences between local slow-waves. Critically, this correlation is present after  
453 factoring out the common coupling to global brain activity, by applying a generalized linear model  
454 (GLM). This is a widely used approach for quantifying the relative contributions of multiple  
455 predictors on the activity of single neurons<sup>8, 38, 49</sup> and neuronal populations<sup>50</sup>. The relation  
456 between the oscillatory phase offset and functional connectivity strength between the different  
457 local populations has been previously demonstrated in the visual cortex<sup>37</sup>.

458 In addition, the distribution of coupling coefficients for the temporal-frontal intra-modular  
459 pairs, defined by showing peri-SWR HFA modulation and SWR-slow-wave synchrony, was much  
460 wider than coupling with other sites (extra-modular; Figure 5E). Similarly, grid phase  
461 offset-dependent strong positive or negative spike train correlations were found only for the grid

462 cell pairs belonging to the same functional module, resulting in wider distribution of intra-modular  
463 coupling strengths<sup>38</sup>. In general, stronger intra-modular connectivity is a hallmark of functional  
464 organization in the brain<sup>39</sup>. These results suggest that slow-waves functionally segregate the  
465 subspace of anatomically distributed neuronal populations, organized by their coupling to local  
466 slow-wave phase. HFA coupling for most of the temporal-frontal target site pairs is negative  
467 suggesting a relatively high dimensional communication space occupied by a larger number of  
468 subspaces defined by the local slow-wave phase differences.

469 Finally, the slow-wave phase-dependent functional coupling between the cortical sites  
470 does not reflect the stable functional connectivity matrix during NREM sleep, but is temporally  
471 coupled to SWRs (Figure 5F). Such a dynamic suggests the role of slow-wave phase-organized  
472 distributed neuronal coalitions in hippocampal-dependent memory consolidation supporting  
473 binding of distributed memory traces<sup>3, 10</sup>.

## 474 **Summary**

475 Various models of hippocampal-dependent memory consolidation implicate binding  
476 between the hippocampal memory traces reactivated during SWRs and the subcortical/cortical  
477 populations encoding various aspects of the same experience<sup>2, 3</sup>. These results suggest the  
478 critical role of a consistent phase relation between the hippocampal SWRs and  
479 subcortical/cortical slow-waves for the selection of local populations active during SWR windows.  
480 In addition, the local slow-wave phases during SWRs predict the functional coupling between the  
481 distant cortical populations, enabling the plasticity necessary for binding of distributed memory  
482 traces. Our findings implicate SWR-slow-wave synchrony as a core mechanism affecting the  
483 content, fidelity and strength of consolidated memories.

484

## 485 **Materials and Methods**

486

### 487 **Experimental Design**

488 The first objective of this study was to map the spatio-temporal modulation of neural activity  
489 around the SWR windows in human brain, as reflected by the HFA amplitude, a proxy measure of

490 population activity in proximity of electrode tip. Additional objective was to assess the  
491 dependence of local subcortical/cortical peri-SWR HFA modulation on the coupling between  
492 hippocampal SWRs and local slow-waves. Finally, we aimed to assess the relation between the  
493 local slow-wave phase differences during SWR windows and HFA functional coupling across the  
494 recorded structures, including the amygdala, temporal and frontal cortices.

495 Twelve pharmacoresistant epileptic patients (7 males, 5 females, age  $38 \pm 4$  (mean  $\pm$   
496 SEM), range 24-57) undergoing presurgical evaluation of seizure foci at the University of  
497 California Irvine (UCI) Medical Center were included in the study based on written informed  
498 consent. All the procedures were performed in accordance with the UCI Institutional Review  
499 Board. The subjects were stereotactically implanted with 6-10 intracranial depth electrodes  
500 (Integra or Ad-Tech, 8-10 macroelectrodes with 5-mm inter-electrode spacing) under robotic  
501 assistance (Rosa Surgical Robot, Medtech, New York, NY). Electrode placements were driven  
502 strictly by clinical diagnostic needs and included the unilateral or bilateral implants in the  
503 hippocampus, amygdala, temporal and frontal cortices. Details of individual patient electrode  
504 locations are given in the Supplementary Table 1. The criteria for subject inclusion were: 1)  
505 presence of at least one hippocampal electrode with  $>100$  SWRs recorded during the seizure-free  
506 overnight sleep; 2) presence of electrodes in at least one extrahippocampal region (amygdala,  
507 temporal or frontal cortices). The local field potential (LFP) was recorded during overnight sleep,  
508 typically starting 8:00-10:00 pm and lasting  $\sim 8$ -12 hours. The LFP was analog-filtered with 0.01  
509 Hz highpass cutoff and recorded at 5000 Hz using the Nihon-Kohden recording system (256  
510 channel amplifier, model JE120A) or at 8000 Hz using the Neuralynx ATLAS Clinical System .  
511 Sleep staging was performed in 30 sec blocks by a sleep specialist (B.A.M.), based on the visual  
512 inspection of scalp EEG at frontal, central, and occipital derivations, electrooculogram and  
513 electromyogram, guided by standard criteria<sup>16, 30</sup>. The NREM sleep stages 2-4 (N2-4) were used  
514 in further analysis (Figure 1D).

515

516

## 517 **Electrode localization**

518 Electrode localization was done using the pre-implantation MRI and post-implantation CT  
519 images. Both images were transformed into Talaraich space, followed by MRI segmentation  
520 (Freesurfer 5.3.067) and co-registration of T1-weighted structural MRI scans to the CT<sup>51</sup>. The  
521 electrode locations and selection of white matter contacts for re-referencing was verified by the  
522 epileptologist (J.J.L.).

## 523 **Recording locations**

524 We analyzed SWRs recorded on 33 hippocampal locations (19 in left and 14 in right  
525 hemisphere; Figure 1B). The extra-hippocampal recording sites were grouped in three regions  
526 (Figure 1B): amygdala (including the basolateral, lateral and centromedial amygdala), temporal  
527 (including the insula, entorhinal, parahippocampal, inferior, medial and superior temporal cortices)  
528 and frontal cortex (including the orbitofrontal, medial prefrontal, dorsomedial and cingulate  
529 cortices). Regional distribution of extrahippocampal recording sites included: 36 (19 left, 17 right)  
530 in amygdala, 180 (106 left, 74 right) in temporal and 189 (89 left, 100 right) in frontal cortex  
531 (Figure 1C; Supplementary Table 1). Distribution of recording sites at individual subject,  
532 hemispheric and regional levels are shown in Table S1.

## 533 **Data Preprocessing**

534 Recordings were re-referenced to the nearest white matter contact, resampled to 2000 Hz  
535 with linear interpolation (resample.m function in Matlab Signal Processing Toolbox) and high-pass  
536 filtered at 0.5 Hz using 4<sup>th</sup> order Chebyshev filter. The data analysis and visualization was  
537 performed using the custom-written Matlab code, as well as the Freely Moving Animal (FMA;  
538 <http://fmatoolbox.sourceforge.net/>), Circular Statistics<sup>52</sup> and FieldTrip<sup>51, 53</sup> toolboxes. Electrodes  
539 outside of the primary epileptogenic regions were used in the analysis. Further, interictal epileptic  
540 discharges (IEDs) on those electrodes were detected based on the combination of amplitude and  
541 derivative thresholds<sup>20</sup>. For amplitude-based IED detection, each LFP trace was low-pass filtered  
542 (300 Hz cutoff frequency) and the envelope of filtered trace was z-scored, while for the



544 derivative-based IED detection, absolute differences between the consecutive voltage samples  
545 were z-scored. IEDs were detected based on the threshold crossing (mean + 5SD) by either the  
546 amplitude or derivative trace (Figure 1E). This method is optimized for detection of sharp  
547 transients that correspond to IEDs. Finally, automatic IED detection accuracy was validated by  
548 comparison with visual scoring performed by an epileptologist (Figure S1B).

549

### 550 **Sharp-wave ripple detection**

551 Following electrode localization, LFP from hippocampal channels was bandpass-filtered in  
552 SWR range (80-150 Hz) using the 4<sup>th</sup> order Chebyshev filter (filtfilt.m function in Matlab Signal  
553 Processing Toolbox), rectified and the upper envelope of rectified trace was z-scored. SWRs  
554 were detected using the FMA Toolbox, based on the double threshold crossing criteria: 1)  
555 envelope trace exceeding mean + 2 SDs for 20-100 ms and 2) the peak during this period  
556 exceeding mean + 5 SDs (Figure S1A). SWRs within 1 sec from nearest IED and hippocampal  
557 channels with < 100 SWRs remaining after exclusion of SWRs in IED proximity were excluded  
558 from analysis.

### 559 **Peri-SWR HFA modulation**

560 The HFA analytical amplitude was calculated by bandpass-filtering the raw LFP in 70-200  
561 Hz range, Hilbert-transforming the filtered signal (hilbert.m function in Matlab Signal Processing  
562 Toolbox) and extracting the analytic signal amplitude. HFA amplitude trace was smoothed by  
563 convolving with Gaussian kernel (15 ms width, fastsmooth.m function in Matlab Signal Processing  
564 Toolbox) and binned (25 ms bin size), resulting in 20 time bins extending over the +/- 250 ms  
565 window centered at SWR peak (peri-SWR window). The time window between -500 and -250 ms  
566 relative to SWR peak was used as a baseline (Figure 2B). Baseline normalization was done at  
567 single trial level, by z-scoring concatenated baseline and peri-SWR HFA time windows. Peri-SWR  
568 HFA modulation was assessed at individual time bin level, by comparing the mean HFA within  
569 each bin with the mean HFA from the baseline period, using the two-tailed paired t-test ( $p < 0.05$ ).

570 Correction for multiple comparisons was done using Benjamini-Hochberg method<sup>55</sup>, based on the  
571 number of time bins within the peri-SWR window ( $n = 20$ ). In addition, peri-SWR HFA modulation  
572 significance criteria at individual channel level included the presence of at least two consecutive  
573 time bins (a total of 50 msec) showing significant peri-SWR HFA modulation in the same direction.  
574 Target sites were first classified based on the presence (HFA+) or absence (HFA-) of significant  
575 peri-SWR HFA modulation. Based on the peri-SWR HFA modulation type, HFA+ sites were  
576 further classified as positively-, negatively- or mixed-modulated, the latter defined by the presence  
577 of both positive and negative modulation periods during peri-SWR window (Figure 2B). The time  
578 bin width choice (25 msec) was based on the fine temporal structure of peri-SWR cortical  
579 neuronal spiking fluctuations in rodents<sup>6, 42</sup> and humans<sup>22</sup>.

### 580 **Principal component analysis of peri-SWR HFA dynamics**

581 Principal component analysis (PCA) of average peri-SWR HFA time-courses was  
582 performed on the pseudo-population consisting of HFA+ target sites from all the subjects, both  
583 ipsi- and contra-lateral to SWR location ( $n = 368$ ). First, the peri-SWR HFA matrix ( $n \times t$ ) was  
584 constructed, with rows representing the individual target site trial-averaged and z-scored  
585 peri-SWR HFA time-courses (-250 to 250 ms), and columns representing 20 peri-SWR time bins  
586 (25 ms each). Covariance was calculated over all the target site pairs and the principal  
587 components were extracted by applying the eig.m Matlab function on peri-SWR HFA covariance  
588 matrix. Individual principal component ( $PC_n$ ) was considered significant if the percentage of  
589 explained variance ( $PC_n \text{ EV\%}$ ) was at least 2-fold larger than the next PC ( $PC_{n+1} \text{ EV\%}$ ). The PC  
590 time-courses (Fig. 3B) were reconstructed by calculating the dot product between the given PC  
591 eigenvector and population vector activity at individual time bins. The regional PC time-courses  
592 were calculated using the PC weights from the target sites localized in a given region and  
593 calculating the dot product with the corresponding HFA population vector from the same region  
594 and time bin. Two-way analysis of variance (ANOVA) with region and hemisphere as the main  
595 factors was performed on the weight distribution of each significant PC, followed by planned  
596 comparisons using the two-tailed t-test ( $p < 0.05$ ).

## 597 **SWR phase locking to target site slow-wave activity**

598 The raw LFP recorded at each extra-hippocampal location was bandpass filtered in  
599 slow-wave range (0.5 - 4 Hz). Filtered traces were Hilbert-transformed and instantaneous phases  
600 were extracted using the angle.m function in Matlab. SWR-slow-wavephase locking is defined as  
601 a measure of consistency of local subcortical/cortical slow-wave phase at the times of  
602 hippocampal SWR peaks (Figure 4A). For each target site, significance of SWR phase locking to  
603 slow-wave in target site was quantified using the Rayleigh test (circ\_rtest.m function, Matlab  
604 Circular Statistics Toolbox<sup>52</sup>). Multiple comparisons correction was performed using the  
605 Benjamini-Hochberg method<sup>55</sup>, based on the number of recording sites in a given subject.  
606 SWR-slow-wave synchrony was defined based on presence or absence of significant  
607 SWR-slow-wave phase locking (SWR-slow-wave+ or SWR-slow-wave-). For each target site  
608 showing SWR-slow-wave synchrony (SWR-slow-wave+), mean SWR-slow-wave phase angle  
609 was computed using circ\_mean.m function (Matlab Circular Statistics Toolbox). Peri-SWR HFA  
610 modulation strength on a given target site (Figure 4C) was defined as the summed absolute  
611 values of a z-scored HFA trace within a 100 msec sliding window (25 msec step size), with  
612 centers starting -200 msec and ending 200 msec following SWR. SWR-slow-wave synchrony  
613 magnitude was defined as the length of vector  $r$ , an output of Rayleigh test (circ\_rtest function  
614 from Matlab Circular Statistics Toolbox). Vector  $r$  could take any value in the range 0-1 and the  
615 higher value denotes SWRs occurring more consistently at given phase of target site slow-wave.  
616 For each target site, correlation between the SWR-slow-wave synchrony magnitude and  
617 peri-SWR HFA modulation strength was calculated using Spearman correlation (Figure 4C).

618 To verify that SWR-slow-wave phase locking is not driven by higher slow-wave amplitude on  
619 a given target site, LFP signal from each target site was filtered in slow-wave range (0.5 - 4 Hz)  
620 and the target site slow-wave average amplitude was computed as the mean of slow-wave  
621 analytical amplitude from individual peri-SWR windows. Comparison of peri-SWR slow-wave  
622 amplitude between the SWR-slow-wave+ and SWR-slow-wave- target sites was done using the  
623 two-tailed t-test for independent samples ( $p < 0.05$ ; Figure S3D). The lack of significant group

624 difference in peri-SWR slow-wave amplitude was interpreted as ruling out the possibility of  
625 peri-SWR slow-wave amplitude having a confounding effect on slow-wave phase extraction and  
626 SWR-slow-wave phase locking calculation.

### 627 **Generalized linear model**

628 The generalized linear model (GLM) analysis was performed by modelling the average  
629 peri-SWR HFA time-course on a target site A (HFA-A) as a function of HFA time-course of  
630 another simultaneously recorded target site (HFA-B) and averaged population peri-SWR HFA  
631 time-course (HFA-pop), with population defined as all the simultaneously recorded target sites,  
632 except A and B. All of the analysis was done at zero time lag. To prevent the influence of absolute  
633 HFA levels on the resulting coupling estimates, individual peri-SWR HFA time-courses were  
634 z-scored. The model fitting was done using a Matlab `glmfit.m` function, with normal distribution.  
635 For each target site pair, the model produced two coefficients ( $\beta_{\text{peer}}$  and  $\beta_{\text{pop}}$ ), reflecting the  
636 predictive power of HFA-B and HFA-pop on HFA-A.  $\beta_{\text{peer}}$  at zero time lag ( $\beta_0$ ) was used in further  
637 analysis. Intra-modular target sites were defined based on the presence of both significant  
638 peri-SWR HFA modulation (HFA+) and SWR-slow-wave synchrony. For each simultaneously  
639 recorded intra-modular target site pair (A and B) with mean SWR-slow-wave phase angles  $\Phi_A$  and  
640  $\Phi_B$ , the absolute SWR-slow-wave phase difference ( $\Phi_{\text{diff}}$ ) was computed as follows:

641

$$642 \quad \Phi_{\text{diff}} = | \Phi_A - \Phi_B | ,$$

643

644 with  $\Phi_a$  and  $\Phi_b$  representing the mean phase angles on the respective target sites, across all the  
645 SWRs recorded on a given hippocampal channel. If the individual within- or cross-regional  $\beta_0$ - $\Phi_{\text{diff}}$   
646 correlation was significant (Spearman correlation,  $p < 0.05$ ), we compared the distributions of  
647  $\beta_0$  coefficients between the intra-modular and extra-modular target site pairs, the latter defined as  
648 the pairs containing just intra-modular target site. Distributions of  $\beta_0$  between each category were  
649 compared using Ansari-Bradley tests ( $p < 0.05$ ). The variance of intra- and extra-modular  $\beta_0$  was  
650 expressed as the standard error of mean (SEM) and calculated for sliding windows (100 msec

651 width, 25 msec step size), centered between -200 and 200 msec around SWR peak. As the  
652 unequal sample size could affect the variance calculation, we randomly sampled 100 sets of  
653 extra-modular target site pairs, equal in size to the intra-modular set ( $n = 166$ ). Significant  
654 difference was reached if the intra-modular variance during given time window exceeded 99th  
655 percentile of the extra-modular set ( $p < 0.01$ ; Figure 5E).

## 656 **Statistical Analysis**

### 657

658 The analysis was done using all the hippocampal channels that passed the inclusion criteria.  
659 This approach was chosen because the SWRs at different hippocampal locations might be  
660 associated with different dynamics in the same extra-hippocampal populations<sup>54</sup>. In addition,  
661 including the hippocampal channels from both hemispheres allowed the testing of both ipsi- and  
662 contralateral brain dynamics during peri-SWR periods. Therefore, the peri-SWR dynamics in all  
663 the extra-hippocampal recording sites was analyzed relative to SWRs on each individual different  
664 hippocampal site in the same subject. For the purpose of this analytical approach, each  
665 extra-hippocampal recording site was defined as a target site, with respect to individual  
666 hippocampal site. Target sites in each region were classified as ipsi- or contralateral relative to  
667 SWR location. The regional distribution of target sites included: 87 (44 ipsilateral, 43 contralateral)  
668 in the amygdala, 521 (250, 271) in temporal and 700 (331, 369) in frontal cortex.

669 All the corrections for multiple comparisons were done using the Benjamini-Hochberg  
670 method<sup>55</sup>. Correction factor was based on the number of time bins during peri-SWR window for  
671 individual target site peri-SWR HFA modulation, the number of recording locations in individual  
672 patient for the SWR-slow-wave phase locking or the number of regional and hemispheric  
673 comparisons in other cases. Analysis was performed on the pseudo-populations, containing all  
674 the target sites that passed inclusion criteria for a given analysis. The target sites with at least 50  
675 IED-free peri-SWR windows ( $\pm 1$  sec) were used for peri-SWR HFA modulation (Figures 2, S2),  
676 SWR-slow-wave phase locking (Figure 4, S3) and GLM-based HFA pairwise coupling analysis  
677 (Figure 5;  $n = 1308$ ). PCA included all the target sites showing significant peri-SWR HFA  
678 modulation (Figure 3;  $n = 368$ ). Correlation between the target site pairwise SWR-slow-wave

679 locking phase difference ( $\phi_{diff}$ ) and HFA coupling coefficient ( $\beta_0$ ) was done for target sites showing  
680 both significant peri-SWR HFA modulation and significant SWR-slow-wave phase locking  
681 (intra-modular;  $n = 234$ ). Main effects of region and hemisphere, as well as region\*hemisphere  
682 interactions in pseudo-populations were obtained using the linear regression (Figures 2, S2, 3),  
683 followed by planned comparisons using chi-square test ( $p < 0.05$ ). Uniformity of SWR-slow-wave  
684 phase distributions was tested using the Rayleigh test (Figure 4;  $p < 0.05$ ).

685  
686

## 687 References

688

- 689 1. Squire, L.R. & Alvarez, P. Retrograde amnesia and memory consolidation: a neurobiological  
690 perspective. *Current opinion in neurobiology* **5**, 169-177 (1995).
- 691 2. Nadel, L. & Moscovitch, M. Memory consolidation, retrograde amnesia and the hippocampal complex.  
692 *Current opinion in neurobiology* **7**, 217-227 (1997).
- 693 3. Buzsáki, G. Two-stage model of memory trace formation: a role for “noisy” brain states. *Neuroscience*  
694 **31**, 551-570 (1989).
- 695 4. Wilson, M.A. & McNaughton, B.L. Reactivation of hippocampal ensemble memories during sleep.  
696 *Science* **265**, 676-679 (1994).
- 697 5. Diba, K. & Buzsáki, G. Forward and reverse hippocampal place-cell sequences during ripples. *Nature*  
698 *neuroscience* **10**, 1241-1242 (2007).
- 699 6. Peyrache, A., Khamassi, M., Benchenane, K., Wiener, S.I. & Battaglia, F.P. Replay of rule-learning  
700 related neural patterns in the prefrontal cortex during sleep. *Nature neuroscience* **12**, 919 (2009).
- 701 7. Wilber, A.A., Skelin, I., Wu, W. & McNaughton, B.L. Laminar organization of encoding and memory  
702 reactivation in the parietal cortex. *Neuron* **95**, 1406-1419. e1405 (2017).
- 703 8. Chung, J.E., *et al.* High-density, long-lasting, and multi-region electrophysiological recordings using  
704 polymer electrode arrays. *Neuron* **101**, 21-31. e25 (2019).
- 705 9. Fries, P. A mechanism for cognitive dynamics: neuronal communication through neuronal coherence.  
706 *Trends in cognitive sciences* **9**, 474-480 (2005).
- 707 10. Klinzing, J.G., Niethard, N. & Born, J. Mechanisms of systems memory consolidation during sleep.  
708 *Nature neuroscience* **22**, 1598-1610 (2019).
- 709 11. Buzsáki, G. Hippocampal sharp wave-ripple: A cognitive biomarker for episodic memory and planning.  
710 *Hippocampus* **25**, 1073-1188 (2015).
- 711 12. Kudrimoti, H.S., Barnes, C.A. & McNaughton, B.L. Reactivation of hippocampal cell assemblies: effects  
712 of behavioral state, experience, and EEG dynamics. *Journal of Neuroscience* **19**, 4090-4101 (1999).
- 713 13. Lansink, C.S., Goltstein, P.M., Lankelma, J.V., McNaughton, B.L. & Pennartz, C.M. Hippocampus  
714 leads ventral striatum in replay of place-reward information. *PLoS biology* **7** (2009).
- 715 14. Siapas, A.G. & Wilson, M.A. Coordinated interactions between hippocampal ripples and cortical  
716 spindles during slow-wave sleep. *Neuron* **21**, 1123-1128 (1998).
- 717 15. Maingret, N., Girardeau, G., Todorova, R., Goutier, M. & Zugaro, M. Hippocampo-cortical coupling  
718 mediates memory consolidation during sleep. *Nature neuroscience* **19**, 959 (2016).
- 719 16. Helfrich, R.F., *et al.* Bidirectional prefrontal-hippocampal dynamics organize information transfer during  
720 sleep in humans. *Nature communications* **10**, 1-16 (2019).
- 721 17. Girardeau, G., Benchenane, K., Wiener, S.I., Buzsáki, G. & Zugaro, M.B. Selective suppression of  
722 hippocampal ripples impairs spatial memory. *Nature neuroscience* **12**, 1222 (2009).
- 723 18. Fernández-Ruiz, A., *et al.* Long-duration hippocampal sharp wave ripples improve memory. *Science*  
724 **364**, 1082-1086 (2019).
- 725 19. Isomura, Y., *et al.* Integration and segregation of activity in entorhinal-hippocampal subregions by  
726 neocortical slow oscillations. *Neuron* **52**, 871-882 (2006).
- 727 20. Staresina, B.P., *et al.* Hierarchical nesting of slow oscillations, spindles and ripples in the human  
728 hippocampus during sleep. *Nature neuroscience* **18**, 1679 (2015).



- 729 21. Steriade, M., Contreras, D., Dossi, R.C. & Nunez, A. The slow (< 1 Hz) oscillation in reticular thalamic  
730 and thalamocortical neurons: scenario of sleep rhythm generation in interacting thalamic and  
731 neocortical networks. *Journal of Neuroscience* **13**, 3284-3299 (1993).
- 732 22. Nir, Y., *et al.* Regional slow waves and spindles in human sleep. *Neuron* **70**, 153-169 (2011).
- 733 23. Massimini, M., Huber, R., Ferrarelli, F., Hill, S. & Tononi, G. The sleep slow oscillation as a traveling  
734 wave. *Journal of Neuroscience* **24**, 6862-6870 (2004).
- 735 24. Mohajerani, M.H., McVea, D.A., Fingas, M. & Murphy, T.H. Mirrored bilateral slow-wave cortical activity  
736 within local circuits revealed by fast bihemispheric voltage-sensitive dye imaging in anesthetized and  
737 awake mice. *Journal of Neuroscience* **30**, 3745-3751 (2010).
- 738 25. Mölle, M., Marshall, L., Gais, S. & Born, J. Learning increases human electroencephalographic  
739 coherence during subsequent slow sleep oscillations. *Proceedings of the National Academy of  
740 Sciences* **101**, 13963-13968 (2004).
- 741 26. Phillips, K.G., *et al.* Decoupling of sleep-dependent cortical and hippocampal interactions in a  
742 neurodevelopmental model of schizophrenia. *Neuron* **76**, 526-533 (2012).
- 743 27. Crone, N.E., Sinai, A. & Korzeniewska, A. High-frequency gamma oscillations and human brain  
744 mapping with electrocorticography. *Progress in brain research* **159**, 275-295 (2006).
- 745 28. Ray, S. & Maunsell, J.H. Different origins of gamma rhythm and high-gamma activity in macaque visual  
746 cortex. *PLoS biology* **9** (2011).
- 747 29. Parvizi, J. & Kastner, S. Promises and limitations of human intracranial electroencephalography.  
748 *Nature neuroscience* **21**, 474-483 (2018).
- 749 30. Rechtschaffen, A. & Kales, A. *A manual of standardized terminology, techniques and scoring system  
750 for sleep stages of human subjects* (U.S. Dept. of Health, Education, and Welfare, Bethesda, Md.,  
751 1968).
- 752 31. Axmacher, N., Elger, C.E. & Fell, J. Ripples in the medial temporal lobe are relevant for human memory  
753 consolidation. *Brain* **131**, 1806-1817 (2008).
- 754 32. Le Van Quyen, M., *et al.* Cell type-specific firing during ripple oscillations in the hippocampal formation  
755 of humans. *Journal of Neuroscience* **28**, 6104-6110 (2008).
- 756 33. Bragin, A., Engel Jr, J., Wilson, C.L., Fried, I. & Buzsáki, G. High-frequency oscillations in human brain.  
757 *Hippocampus* **9**, 137-142 (1999).
- 758 34. Skaggs, W.E., *et al.* EEG sharp waves and sparse ensemble unit activity in the macaque hippocampus.  
759 *Journal of neurophysiology* **98**, 898-910 (2007).
- 760 35. Logothetis, N.K., *et al.* Hippocampal-cortical interaction during periods of subcortical silence. *Nature*  
761 **491**, 547-553 (2012).
- 762 36. Buzsáki, G. & Draguhn, A. Neuronal oscillations in cortical networks. *science* **304**, 1926-1929 (2004).
- 763 37. Womelsdorf, T., *et al.* Modulation of neuronal interactions through neuronal synchronization. *science*  
764 **316**, 1609-1612 (2007).
- 765 38. Gardner, R.J., Lu, L., Wernle, T., Moser, M.-B. & Moser, E.I. Correlation structure of grid cells is  
766 preserved during sleep. *Nature neuroscience* **22**, 598-608 (2019).
- 767 39. Bullmore, E. & Sporns, O. Complex brain networks: graph theoretical analysis of structural and  
768 functional systems. *Nature reviews neuroscience* **10**, 186-198 (2009).
- 769 40. Skelin, I., Kilianski, S. & McNaughton, B.L. Hippocampal coupling with cortical and subcortical  
770 structures in the context of memory consolidation. *Neurobiology of learning and memory* **160**, 21-31  
771 (2019).
- 772 41. Teyler, T.J. & DiScenna, P. The hippocampal memory indexing theory. *Behavioral neuroscience* **100**,  
773 147 (1986).
- 774 42. Battaglia, F.P., Sutherland, G.R. & McNaughton, B.L. Hippocampal sharp wave bursts coincide with  
775 neocortical "up-state" transitions. *Learning & Memory* **11**, 697-704 (2004).
- 776 43. Peyrache, A., Battaglia, F.P. & Destexhe, A. Inhibition recruitment in prefrontal cortex during sleep  
777 spindles and gating of hippocampal inputs. *Proceedings of the National Academy of Sciences* **108**,  
778 17207-17212 (2011).
- 779 44. Johnson, E.L., *et al.* Dynamic frontotemporal systems process space and time in working memory.  
780 *PLoS biology* **16**, e2004274 (2018).
- 781 45. Murphy, M., *et al.* Source modeling sleep slow waves. *Proceedings of the National Academy of  
782 Sciences* **106**, 1608-1613 (2009).
- 783 46. Huber, R., Ghilardi, M.F., Massimini, M. & Tononi, G. Local sleep and learning. *Nature* **430**, 78-81  
784 (2004).
- 785 47. Huber, R., *et al.* Arm immobilization causes cortical plastic changes and locally decreases sleep slow  
786 wave activity. *Nature neuroscience* **9**, 1169-1176 (2006).
- 787 48. Letzkus, J.J., Wolff, S.B. & Lüthi, A. Disinhibition, a circuit mechanism for associative learning and  
788 memory. *Neuron* **88**, 264-276 (2015).

- 789 49. Harris, K.D., Csicsvari, J., Hirase, H., Dragoi, G. & Buzsáki, G. Organization of cell assemblies in the  
790 hippocampus. *Nature* **424**, 552-556 (2003).
- 791 50. Lahaye, P.-J., Poline, J.-B., Flandin, G., Dodel, S. & Garnero, L. Functional connectivity: studying  
792 nonlinear, delayed interactions between BOLD signals. *NeuroImage* **20**, 962-974 (2003).
- 793 51. Stolk, A., *et al.* Integrated analysis of anatomical and electrophysiological human intracranial data.  
794 *Nature protocols* **13**, 1699-1723 (2018).
- 795 52. Berens, P. CircStat: a MATLAB toolbox for circular statistics. *J Stat Softw* **31**, 1-21 (2009).
- 796 53. Oostenveld, R., Fries, P., Maris, E. & Schoffelen, J.-M. FieldTrip: open source software for advanced  
797 analysis of MEG, EEG, and invasive electrophysiological data. *Computational intelligence and*  
798 *neuroscience* **2011** (2011).
- 799 54. Sosa, M., Joo, H.R. & Frank, L.M. Dorsal and Ventral Hippocampal Sharp-Wave Ripples Activate  
800 Distinct Nucleus Accumbens Networks. *Neuron* (2019).
- 801 55. Benjamini, Y. & Hochberg, Y. Controlling the false discovery rate: a practical and powerful approach to  
802 multiple testing. *Journal of the Royal statistical society: series B (Methodological)* **57**, 289-300 (1995).

803  
804  
805

## 806 **Acknowledgments**

807  
808  
809

**General:** We wish to thank Aaron Wilber for the useful comments and discussion, as well as the patients, nurses, technicians, and physicians at the University of California Irvine Epilepsy Unit.

810

**Funding:** This work was supported by the XSEDE Support IBN180014 to I.S. the NSF 1631465 and DARPA HR0011-18-2-0021 grants to B.L.M., as well as 1U19NS107609-01 NIH Grant to R.T.K. (subcontract to J.J.L.), NINDS Grant NS21135 to RTK and the Roneet Carmell Memorial Endowment Fund support to J.J.L.

814

**Author contributions:** Conceptualization, I.S. and J.J.L.; Methodology, I.S., J.Z., H.Z., B.A.M., S.M., O.K.M., S.V.; Surgeries, S.V.; Investigation, I.S., J.Z.; Formal Analysis, I.S.; Writing - Original Draft, I.S.; Writing - Review & Editing, I.S. and J.J.L., with input from other authors; Funding Acquisition, I.S., B.L.M., R.T.K. and J.J.L.; Resources, B.L.M., R.T.K. and J.J.L.; Supervision, J.J.L.

820

**Competing interests:** The authors declare no competing interests.

821

**Data and materials availability:** Data and code are available from the corresponding author upon reasonable request.

822

823

824

825

826

827  
828  
829

## Supplementary Materials

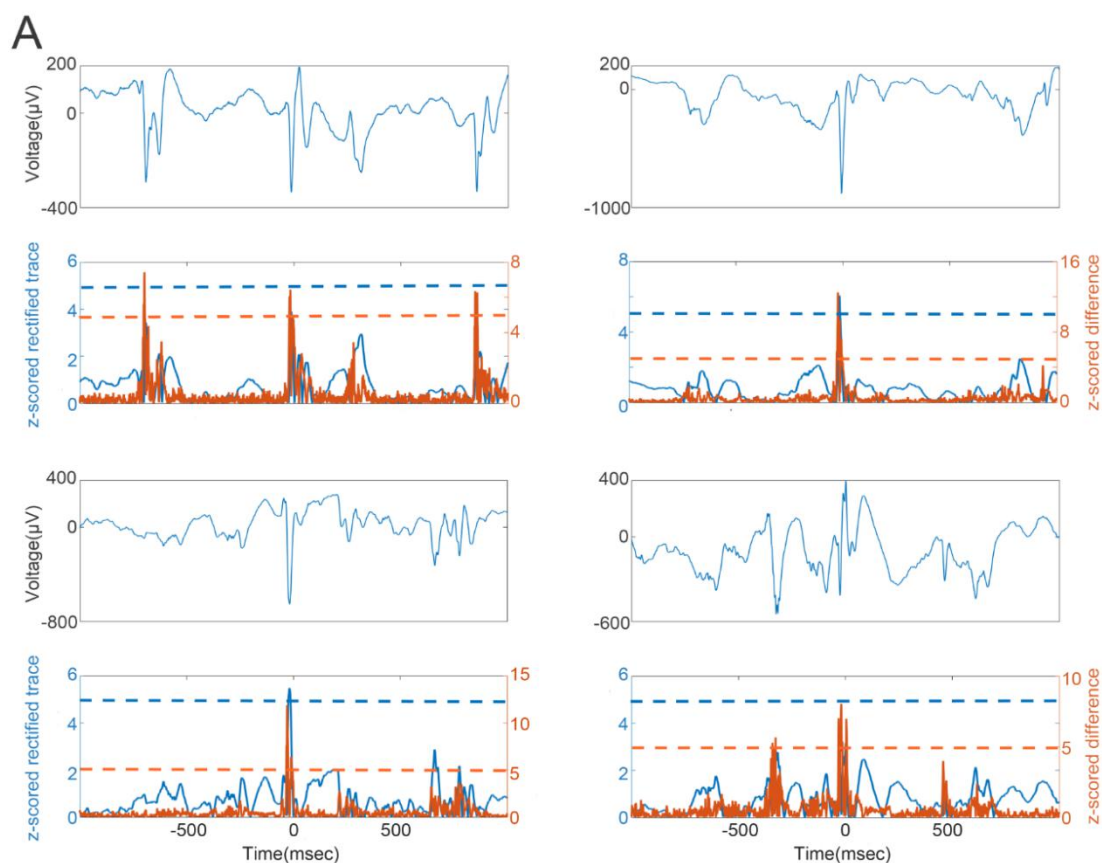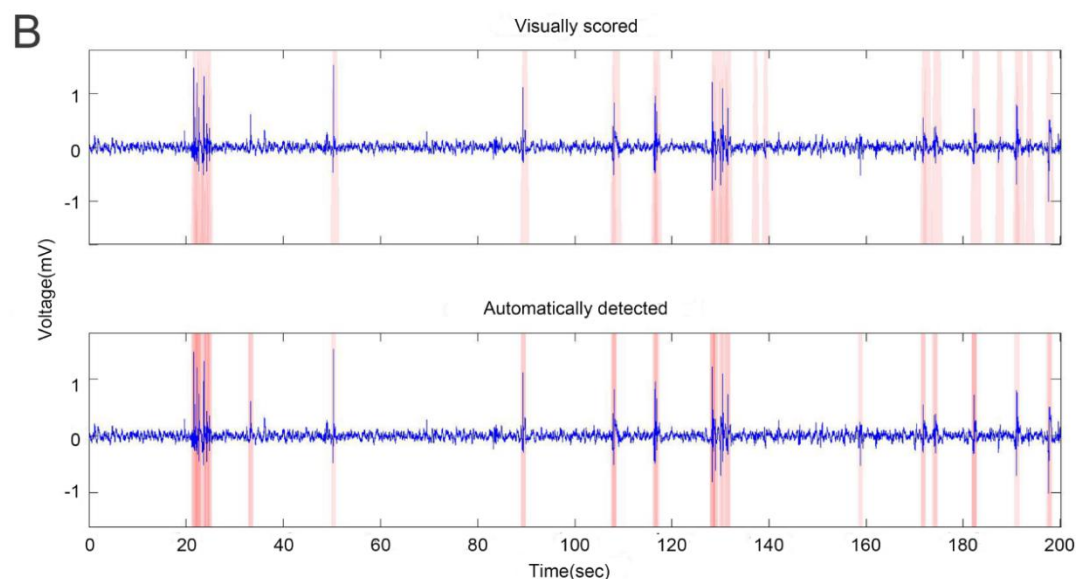

830  
831  
832  
833  
834  
835  
836  
837  
838

**Supplementary Fig.1. Detection of interictal epileptic discharges (IEDs).** a, Examples of detected interictal epileptic discharges (IEDs) and illustration of IED detection algorithm. The top plot in each example: raw LFP trace around the IED. Bottom plot in each example: Blue - z-scored rectified raw trace. Orange - z-scored derivative of raw trace. Detection was based on any of the two traces crossing the threshold of mean + 5SD (dashed lines). The periods of  $\pm 1$  sec around the detected IEDs were excluded from the analysis. b, Example of the raw local field potential (LFP) trace with IEDs (pink bars) annotated by a trained observer (top). The same LFP trace with IEDs detected by an automatic algorithm (pink bars, bottom).

839

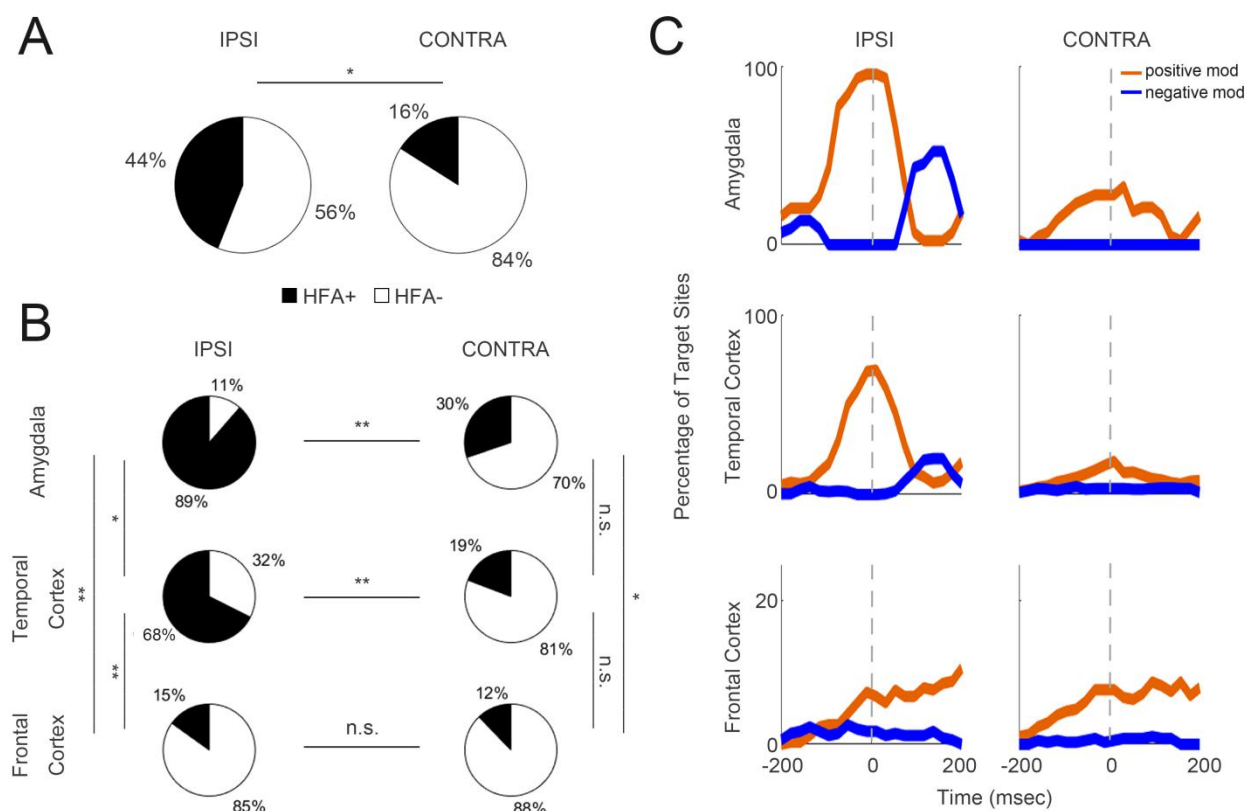

840

841

842

843

844

845

846

847

848

849

850

851

852

853

854

855

856

857

858

859

860

861

862

863

864

865

866

**Supplementary Fig. 2. Regional and hemispheric distributions of peri-SWR HFA modulation.**

**a**, Percentage of significant high frequency activity modulation (HFA+) around SWRs is higher in the hemisphere ipsilateral to SWR location, relative to contralateral ( $\chi^2(1, n = 1308) = 116.2, p < 10^{-10}$ ). Black: HFA+. White: HFA-. **b**, Percentages of HFA+ are significantly higher in the amygdala and temporal cortex, relative to frontal cortex. HFA+ percentages are higher ipsilateral to SWR location in amygdala and temporal cortex, but not in the frontal cortex ( $\chi^2$  test,  $p < 0.05$ , statistical details in Supplementary Table 2B). Black: HFA+. White: HFA-. **c**, Regional percentages of target sites showing significantly positive (orange) or negative (blue) HFA modulation at a given time bin during the peri-SWR window. Left column - ipsilateral and right column - contralateral to SWR location. SWR peak time is shown as dashed line. Black: HFA+. White: HFA-.

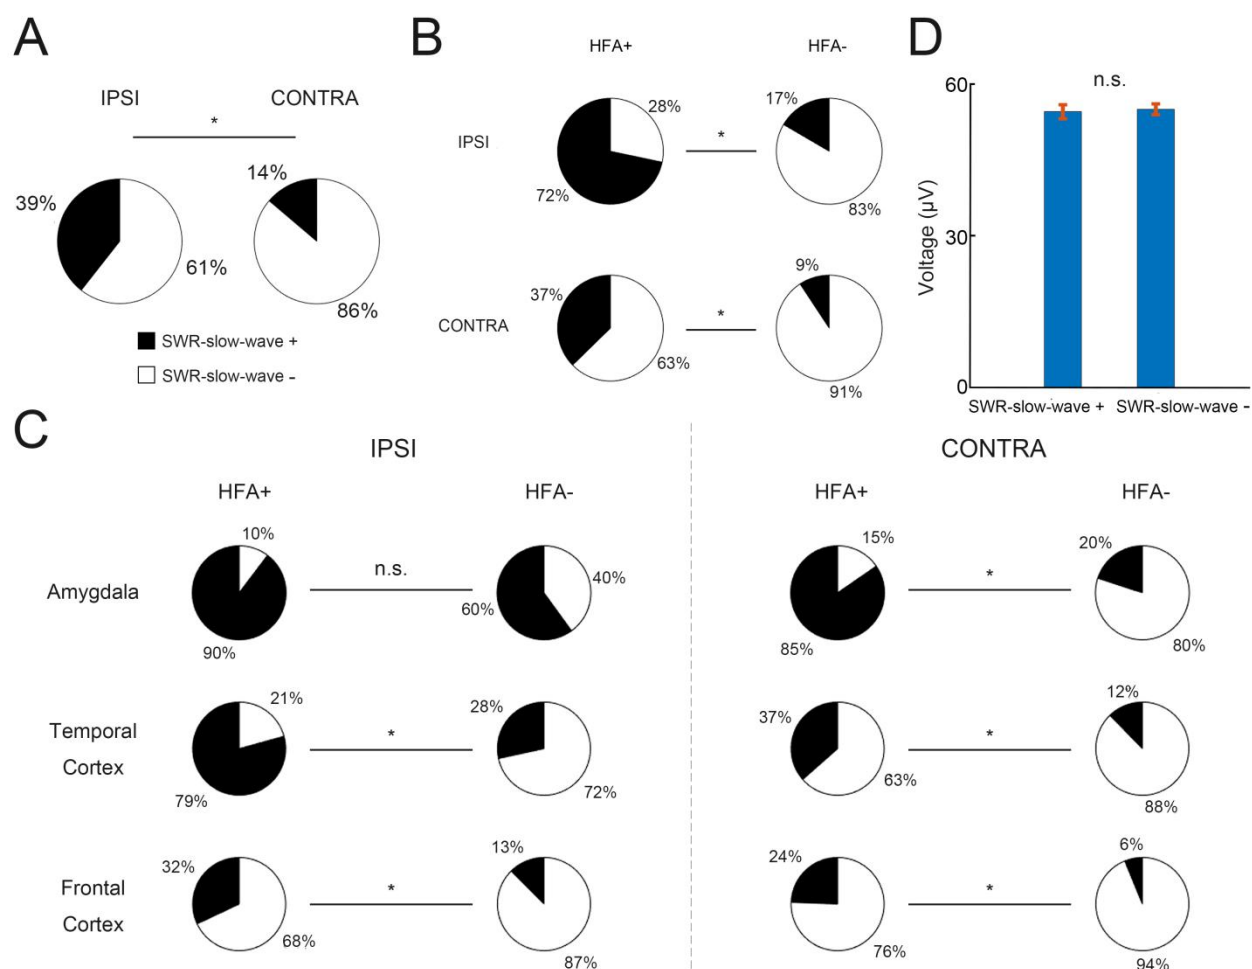

**Supplementary Fig.3. SWR synchrony with subcortical/cortical slow-waves (SWR-slow-wave +) predicts local peri-SWR HFA modulation at the hemispheric and regional level.** **a**, Percentage of SWR-slow-wave+ target sites is significantly higher ipsilateral to SWR location. Pseudo-population consisting of 625 ipsilateral and 683 contralateral locations ( $\chi^2(1, n = 1308) = 131.3, p < 10^{-10}$ ). Black: SWR-slow-wave+. White: SWR-slow-wave-. **b**, Right: Percentages of SWR-slow wave+ phase locking are higher for the target sites with significant peri-SWR HFA modulation (HFA+), relative to target sites without significant peri-SWR HFA modulation (HFA-), both ipsilateral ( $\chi^2(1, n = 625) = 182.5, p < 10^{-10}$ ) and contralateral ( $\chi^2(1, n = 683) = 53.4, p < 10^{-10}$ ) to SWR location. Black: SWR-slow-wave+. White: SWR-slow-wave-. **c**, Percentages of SWR-slow wave+ phase locking are significantly higher for the target sites with significant peri-SWR HFA modulation (HFA+) in all the regions ipsilateral and contralateral to SWR location ( $\chi^2 > 10$ , all  $p$ 's  $< 10^{-3}$ ), except the ipsilateral amygdala ( $\chi^2(1, n = 44) = 3.3, p = 0.07$ ). Black: SWR-slow-wave+. White: SWR-slow-wave-. **d**, Slow-wave amplitude during peri-SWR period ( $\pm 1$  sec) does not differ between the SWR-slow wave+ and SWR-slow wave- target sites ( $t(1306) = 0.19, p = 0.85; n = 1308$ ). The data is shown as mean  $\pm$  SEM. Black: SWR-slow-wave+. White: SWR-slow-wave-.

| Subject ID | Sex, Age | HIPP (L, R) | AMY (L, R) | TEMP (L, R) | FRON (L, R) |
|------------|----------|-------------|------------|-------------|-------------|
| 1          | M, 41    | 1, 0        | 1, 3       | 5, 11       | 16, 11      |
| 2          | F, 32    | 1, 0        | 4, 4       | 12, 5       | 3, 12       |
| 3          | F, 48    | 2, 1        | 0, 3       | 4, 10       | 9, 9        |
| 4          | M, 24    | 4, 2        | 3, 0       | 8, 13       | 0, 21       |
| 5          | F, 55    | 1, 2        | 0, 2       | 13, 3       | 2, 9        |
| 6          | F, 33    | 1, 0        | 0, 0       | 4, 0        | 0, 0        |
| 7          | M, 56    | 1, 0        | 1, 0       | 9, 0        | 0, 0        |
| 8          | M, 28    | 4, 0        | 2, 2       | 5, 6        | 11, 9       |
| 9          | M, 27    | 1, 2        | 0, 0       | 14, 7       | 13, 9       |
| 10         | M, 57    | 1, 0        | 3, 0       | 10, 0       | 7, 0        |
| 11         | F, 25    | 2, 4        | 2, 2       | 8, 12       | 28, 20      |
| 12         | M, 29    | 0, 3        | 3, 1       | 14, 7       | 0, 0        |

895  
896  
897

**Supplementary Table 1.** Recording site distributions across the subjects, hemispheres and regions. L = Left, R = Right. HIPP = hippocampus, AMY = amygdala, TEMP = temporal cortex, FRON = frontal cortex.

898  
899

| <b>Ipsilateral</b>   | <b>Peri-SWR HFA modulation</b> |
|----------------------|--------------------------------|
| <b>Amygdala</b>      | 39/44 (88.6%)                  |
| <b>Temporal</b>      | 189/250 (67.6%)                |
| <b>Frontal</b>       | 50/331 (15.1%)                 |
| <b>Contralateral</b> | <b>Peri-SWR HFA modulation</b> |
| <b>Amygdala</b>      | 13/43 (30.2%)                  |
| <b>Temporal</b>      | 52/271 (19.2%)                 |
| <b>Frontal</b>       | 45/369 (12.2%)                 |

900  
901  
902  
903  
904  
905  
906  
907  
908  
909  
910  
911  
912  
913  
914  
915  
916  
917  
918  
919

**Supplementary Table 2A.** The numbers and percentages of target sites showing significant peri-SWR high frequency activity modulation in each region and hemisphere (ipsi- or contralateral to SWR location). Ipsilateral and contralateral denotes the target site hemisphere, relative to SWR location.



| <b>Ipsilateral</b>         | <b>Chi-square statistics</b>          |
|----------------------------|---------------------------------------|
| <b>Temporal-Frontal**</b>  | $\chi^2(1,580) = 167.1; p < 10^{-10}$ |
| <b>Temporal-Amygdala*</b>  | $\chi^2(1,293) = 8.0; p < 0.005$      |
| <b>Frontal-Amygdala**</b>  | $\chi^2(1,374) = 116.0; p < 10^{-10}$ |
| <b>Contralateral</b>       | <b>Chi-square statistics</b>          |
| <b>Temporal-Frontal</b>    | $\chi^2(1,639) = 5.9; p < 0.05$       |
| <b>Temporal-Amygdala</b>   | $\chi^2(1,313) = 2.8; p = 0.10$       |
| <b>Frontal-Amygdala*</b>   | $\chi^2(1,411) = 10.4; p < 0.005$     |
| <b>Interhemispheric</b>    | <b>Chi-square statistics</b>          |
| <b>Temporal-Temporal**</b> | $\chi^2(1,520) = 124.8; p < 10^{-10}$ |
| <b>Frontal-Frontal</b>     | $\chi^2(1,699) = 1.3; p = 0.26$       |
| <b>Amygdala-Amygdala**</b> | $\chi^2(1,86) = 30.8; p < 10^{-7}$    |

920  
921  
922  
923  
924  
925

**Supplementary Table 2B.** Chi-square statistics for the regional and hemispheric percentages of peri-SWR HFA modulation ( $p < 0.05$ , Benjamini-Hochberg correction for multiple comparisons; \* $p < 0.005$ , \*\* $p < 0.0005$ ). Ipsilateral and contralateral denotes the target site hemisphere, relative to SWR location.

|                                      | <b>PC1</b>                            | <b>PC2</b>                           | <b>PC3</b>                       |
|--------------------------------------|---------------------------------------|--------------------------------------|----------------------------------|
| <b>Region</b>                        | F(2,367) = 133.1<br>** $p < 10^{-10}$ | F(2,367) = 37.4<br>** $p < 10^{-10}$ | F(2,367) = 7.3<br>* $p < 0.001$  |
| <b>Hemisphere</b>                    | F(1,367) = 17.8<br>* $p < 10^{-4}$    | F(1,367) = 8.7<br>* $p < 0.005$      | F(1,367) = 15.0<br>* $p < 0.005$ |
| <b>Region Hemisphere Interaction</b> | F(2,367) = 32.4<br>** $p < 10^{-10}$  | F(2,367) = 11.6<br>** $p < 10^{-10}$ | F(2,367) = 2.4<br>$p = 0.1$      |
| <b>Temporal - Frontal</b>            | t(1,217) = -18.6<br>** $p < 10^{-10}$ | t(1,217) = 10.5<br>** $p < 10^{-10}$ | t(1,217) = -3.4<br>* $p < 0.005$ |
| <b>Temporal - Amygdala</b>           | t(1,206) = 2.86,<br>$p = 0.01$        | t(1,206) = 3.83,<br>* $p < 10^{-3}$  | t(1,206) = 1.53,<br>$p = 0.11$   |
| <b>Frontal - Amygdala</b>            | t(1,87) = 15.6,<br>* $p < 10^{-10}$   | t(1,87) = 8.29,<br>** $p < 10^{-10}$ | t(1,87) = 1.43,<br>$p = 0.16$    |

926  
927  
928  
929  
930  
931  
932  
933  
934  
935  
936  
937  
938  
939  
940

**Supplementary Table 3.** T-test statistics for the regional comparisons of the first three principal component weights ( $p < 0.05$ , Benjamini-Hochberg correction for multiple comparisons; \* $p < 0.005$ , \*\* $p < 0.0005$ ). Ipsilateral denotes the target site hemisphere, relative to SWR location.

941

| <b>Ipsilateral</b>   | <b>HFA + sites</b>         | <b>HFA- sites</b> | <b>Chi-square statistics</b>         |
|----------------------|----------------------------|-------------------|--------------------------------------|
| <b>Temporal**</b>    | 79.3% (134/169)            | 28.4% (23/81)     | $\chi^2(1,250) = 60.7, p < 10^{-10}$ |
| <b>Frontal*</b>      | 32.0% (16/50)              | 12.5% (35/281)    | $\chi^2(1,331) = 12.4, p < 10^{-3}$  |
| <b>Amygdala</b>      | 89.7% (35/39)              | 60.0% (3/5)       | $\chi^2(1,44) = 3.3, p = 0.07$       |
| <b>Contralateral</b> | <b>HFA + sites</b>         | <b>HFA- sites</b> | <b>Chi-square statistics</b>         |
| <b>Temporal*</b>     | 36.5% (19/52)              | 12.3% (27/219)    | $\chi^2(1,271) = 17.5, p < 10^{-4}$  |
| <b>Frontal*</b>      | 24.4% (11/45)              | 6.2% (20/324)     | $\chi^2(1,370) = 17.1, p < 10^{-4}$  |
| <b>Amygdala*</b>     | 84.6% (11/13) <sup>2</sup> | 20.0% (6/30)      | $\chi^2(1, 43) = 15.8, p < 10^{-4}$  |

942  
943  
944  
945  
946  
947  
948  
949

**Supplementary Table 4.** Chi-square statistics for the comparisons of SWR phase locking to slow waves on target sites showing significant or non-significant peri-SWR high frequency activity modulation ( $p < 0.05$ , Benjamini-Hochberg correction for multiple comparisons; \* $p < 0.005$ , \*\* $p < 0.0005$ ). Ipsilateral and contralateral denotes the target site hemisphere, relative to SWR location.

|                          |                                       |
|--------------------------|---------------------------------------|
| <b>All pairs</b>         | $r = -0.04; p = 0.05; n = 1716$ pairs |
| <b>Ipsilateral</b>       |                                       |
| <b>Temporal-Frontal*</b> | $r = -0.26; p < 0.001; n = 166$ pairs |
| <b>Temporal-Amygdala</b> | $r = 0.10; p = 0.09; n = 302$ pairs   |
| <b>Frontal-Amygdala</b>  | $r = 0.10; p = 0.60; n = 32$ pairs    |
| <b>Temporal-Temporal</b> | $r = -0.09; p = 0.04; n = 450$ pairs  |
| <b>Contralateral</b>     |                                       |
| <b>Temporal-Temporal</b> | $r = -0.41; p = 0.02; n = 32$ pairs   |
| <b>Inter-Hemispheric</b> |                                       |
| <b>Temporal-Temporal</b> | $r = -0.02; p = 0.75; n = 176$ pairs  |

950  
951  
952  
953  
954  
955  
956  
957  
958  
959  
960  
961  
962  
963  
964  
965  
966

**Supplementary Table 5.** Correlation between the beta coefficient and phase difference at the whole brain, within- and cross-regional levels. Only the region pairs with more than 20 target site pairs were included in the analysis (Spearman correlation; \* $p < 0.05$ ; Benjamini-Hochberg correction for multiple comparisons).

**Movie S1. Temporal dynamics of significant peri-SWR HFA modulations in the hemisphere ipsilateral (left) or contralateral (right) to SWR location.** The time window includes  $\pm 250$  ms around the SWR peak, binned into 25 msec time bins (20-time bins in total). Significant HFA modulations were more prevalent in the hemisphere ipsilateral to SWR location and in the temporal lobe (amygdala and temporal cortex), relative to the frontal cortex. Orange or blue markers denote the anatomical locations of significant positive or negative modulations at a given time during the peri-SWR window. Note the widespread HFA decrease  $\sim 100$  msec following the SWR peak in the ipsilateral temporal lobe, but not in the contralateral hemisphere.
